1 **Fibronectin-dependent tissue mechanics regulate the translation of segmentation clock**  
2 **oscillations into periodic somite formation**

3

4

5

6

7 Patrícia Gomes de Almeida<sup>1,2,3</sup>, Pedro Rifes<sup>1,#</sup>, Ana Patrícia Martins-Jesus<sup>2,3</sup>, Gonçalo G. Pinheiro<sup>1,2</sup>,  
8 Raquel P. Andrade<sup>2,3,4,\*</sup> and Sólveig Thorsteinsdóttir<sup>1,\*,¶</sup>

9

10 <sup>1</sup> Centre for Ecology, Evolution and Environmental Change – cE3c, Departamento de Biologia  
11 Animal, Faculdade de Ciências, Universidade de Lisboa, 1740-016 Lisboa, Portugal

12 <sup>2</sup> Centre for Biomedical Research - CBMR, Universidade do Algarve, 8005-139 Faro, Portugal

13 <sup>3</sup> Algarve Biomedical Center, Campus Gambelas, Edifício 2. Ala Norte, 8005-139 Faro, Portugal

14 <sup>4</sup> Department of Medicine and Biomedical Sciences, Universidade do Algarve, 8005-139 Faro,  
15 Portugal

16

17 <sup>#</sup>Present address: The Novo Nordisk Foundation Center for Stem Cell Biology (DanStem), University  
18 of Copenhagen, 2200 Copenhagen N, Denmark

19

20 <sup>\*</sup>These authors contributed equally.

21 <sup>¶</sup>Correspondence to: Sólveig Thorsteinsdóttir ([solveig@fc.ul.pt](mailto:solveig@fc.ul.pt))

22 **Abstract:**

23 Somitogenesis starts with cyclic waves of expression of segmentation clock genes in the presomitic  
24 mesoderm (PSM) and culminates with periodic budding of somites in its anterior-most region. How  
25 cyclic clock gene expression is translated into timely morphological somite formation has  
26 remained unclear. A posterior to anterior gradient of increasing PSM tissue cohesion correlates  
27 with increasing fibronectin matrix complexity around the PSM, suggesting that fibronectin-  
28 dependent tissue mechanics may be involved in this transition. Here we address whether the  
29 mechanical properties of the PSM tissue play a role in regulating the pathway leading to cleft  
30 formation in the anterior PSM. We first interfered with cytoskeletal contractility in the chick PSM  
31 by disrupting actomyosin-mediated contractility directly or via Rho-associated protein kinase  
32 function. Then we perturbed fibronectin matrix accumulation around the PSM tissue by blocking  
33 integrin-fibronectin binding or fibronectin matrix assembly. All four treatments perturbed *hairy1*  
34 and *meso1* expression dynamics and resulted in defective somitic clefts. A model is presented  
35 where a gradient of fibronectin-dependent tissue mechanics participates in the PSM wavefront of  
36 maturation by ensuring the correct spatio-temporal conversion of cyclic segmentation clock gene  
37 expression into periodic somite formation.

38

39 **Keywords:**

40 Fibronectin, Tissue mechanics, Segmentation Clock, Cleft Formation, Somitogenesis

41 **Introduction:**

42 Cells in the developing embryo are constantly receiving and integrating information,  
43 including mechanical signals generated by the adhesion to neighbor cells and/or the surrounding  
44 extracellular matrix (ECM). Cell-cell adhesion molecules and cell-ECM receptors, such as cadherins  
45 and integrins, respectively, are linked to the intracellular actomyosin cytoskeleton via  
46 intermediate proteins (Campbell and Humphries, 2011; Charras and Yap, 2018; Takeichi, 2014;  
47 Wolfenson et al., 2013). These adhesion complexes, called adhesomes, allow cells to perceive and  
48 respond to changes in their physical surroundings (Horton et al., 2016; Zaidel-Bar, 2013). Signaling  
49 events in adhesomes can impact the actomyosin cytoskeleton through the phosphorylation of  
50 non-muscle myosin II (NM II) which binds to actin and converts ATP into mechanical energy (Zaidel-  
51 Bar et al., 2015). The resulting actomyosin contractility leads to changes in cell shape and can  
52 transmit signals from integrin adhesomes to cadherin adhesomes and vice versa, as well as from  
53 the cell surface to the nucleus (Burute and Thery, 2012; Mui et al., 2016; Wolfenson et al., 2019).  
54 In this way, through continuous probing of their mechanical environment, cells adjust their shape,  
55 functions and behaviors, such as proliferation, differentiation, cell polarity and migration (Burute  
56 and Thery, 2012; Mui et al., 2016; Wolfenson et al., 2019). While morphogens have been  
57 extensively studied as major chemical regulators of developmental processes (Marek and Kubíček,  
58 1981; Slack, 1987; Tiedemann, 1976), the importance of mechanical forces in embryo  
59 development has, until recently, received less attention (Marek and Kubíček, 1981; Slack, 1987;  
60 Tiedemann, 1976). It is, however, becoming increasingly clear that the ability of cells to sense and  
61 respond to mechanical signals regulates numerous basic developmental processes (e.g. Barriga et  
62 al., 2018; Brunet et al., 2013; Hiramatsu et al., 2013; Smutny et al., 2017).

63 One of the most conspicuous morphogenetic events during early vertebrate  
64 embryogenesis is the formation of somites, which are the source of axial skeleton and skeletal  
65 muscle precursor cells (Christ et al., 2007). Somites are spheres of epithelioid cells that are formed  
66 periodically from the anterior portion of the mesenchymal presomitic mesoderm (PSM), bilateral

67 to the axial structures (Bailey and Dale, 2015). Temporal control of somite formation is dependent  
68 on cyclic waves of expression of segmentation clock genes, many of which are targets of the Notch  
69 signaling pathway (Dequéant et al., 2006; Masamizu et al., 2006; Palmeirim et al., 1997). These  
70 waves periodically sweep the PSM in a posterior to anterior direction (Aulehla and Pourquié, 2010;  
71 Bailey and Dale, 2015) and, as they reach the anterior PSM, oscillations slow down and then arrest  
72 (Morimoto et al., 2005; Shih et al., 2015). The transcription factor *Mesp2/Meso1* is upregulated  
73 downstream of the segmentation clock in the anterior PSM, leading to Eph/Ephrin signaling and  
74 somitic cleft formation (Barrios et al., 2003; Nakajima et al., 2006; Saga, 2012; Watanabe et al.,  
75 2009), followed by progressive cell rearrangements into a somite (Martins et al., 2009; Morimoto  
76 et al., 2005; Shih et al., 2015).

77 Fibronectin is essential for somite formation in all vertebrate models studied to date  
78 (George et al., 1993; Georges-Labouesse et al., 1996; Goh et al., 1997; Koshida et al., 2005;  
79 Kragtorp and Miller, 2007; Rifes et al., 2007; Sato et al., 2007). Fibronectin matrix assembly is a  
80 complex cell-dependent process that requires the engagement and unfolding of globular  
81 fibronectin by the major fibronectin matrix assembly receptor, the  $\alpha5\beta1$  integrin, followed by  
82 fibrillogenesis involving fibronectin-fibronectin binding (Mao and Schwarzbauer, 2005; Singh et al.,  
83 2010). In the chick, a fibronectin matrix starts being assembled around the caudal PSM tissue and  
84 then gets progressively denser as the tissue matures (Rifes et al., 2007; Rifes and Thorsteinsdóttir,  
85 2012). This results in the formation of a gradient of fibronectin matrix complexity along the PSM  
86 (Rifes and Thorsteinsdóttir, 2012), which correlates with a posterior to anterior gradient in cell  
87 density (Bénazéraf et al., 2010; Lawton et al., 2013; Mongera et al., 2018). At the rostral end,  
88 fibronectin is required for the polarization of N-cadherin and epithelialization of peripheral cells  
89 to form a somite (Martins et al., 2009; Rifes et al., 2007). Interestingly, adhesion to a fibronectin  
90 substrate was noted as a regulator of the oscillations of the segmentation clock gene *Lfng* in  
91 cultured mouse tailbud cells (Hubaud et al., 2017; Lauschke et al., 2013). Cell adhesion to  
92 fibronectin was linked to dampening and eventual arrest of *Lfng* oscillations (Hubaud et al.,

93 2017), reminiscent of what is observed in the anterior PSM prior to somite epithelialization.  
94 However, whether the mechanical properties of the PSM tissue play a role in the slowing down of  
95 segmentation clock oscillations and their conversion into segments remains unknown.

96 In this study, we addressed the involvement of PSM tissue mechanics in the regulation of  
97 both segmentation clock gene expression dynamics and subsequent somite formation using the  
98 chick embryo as a model. First, we experimentally perturbed actomyosin contractility by blocking  
99 either NM II ATPase activity or Rho-associated protein kinase (ROCK). We then addressed the role  
100 of the fibronectin matrix surrounding the PSM by blocking integrin-fibronectin binding through  
101 RGD or by perturbing extracellular fibronectin fibrillogenesis. We found that each one of the four  
102 treatments resulted in abnormal segmentation clock oscillations, mis-positioning of *meso1*  
103 expression in the rostral PSM and perturbations in somite morphogenesis. These results strongly  
104 suggest that fibronectin-dependent PSM tissue mechanics play a role in converting segmentation  
105 clock oscillations into periodic somite formation.

106

## 107 **Results:**

### 108 Intracellular actomyosin contractility is required for timely segmentation clock oscillations and 109 *meso1* activation

110 In the chick embryo, sequential pairs of somites bud off from the anterior PSM every 90  
111 min, which corresponds to the period of segmentation clock oscillations (Figure 1 A). To investigate  
112 the involvement of intracellular actomyosin contractility in this process, the expression of the  
113 segmentation clock gene *hairy1* (Palmeirim et al., 1997) was analyzed in the PSM of embryo half  
114 explants cultured in the presence of either Blebbistatin, which directly inhibits the ATPase activity  
115 of NM II and consequently all actomyosin contractility (direct inhibition), or RockOut, a chemical  
116 inhibitor of ROCK I and II (ROCK I/II) enzymes involved in activating NM II (indirect inhibition)  
117 (Figure 1 B, C; Ringer et al., 2017; Straight et al., 2003; Yarrow et al., 2005). The contralateral  
118 control sides were cultured with an equal volume of DMSO.

119            Explants cultured for 6 hours in each experimental condition presented significantly  
120 altered *hairy1* expression. *hairy1* expression was either absent or in a different phase of the cycle  
121 relative to the contralateral control in 80% of the Blebbistatin- (n=7/9) and RockOut-treated  
122 explants (n= 8/10; Figure 1 D, a-c), suggesting that temporal control of *hairy1* oscillations requires  
123 the generation of tensional cues mediated by NM II and ROCK I/II activity.

124            Segmentation clock oscillations are required for the correct spatial and temporal  
125 upregulation of *Mesp2* in the anterior PSM (Niwa et al., 2011; Saga and Takeda, 2001; Sato et al.,  
126 2002), which regulates downstream targets needed for the formation of the somitic cleft (Saga,  
127 2012). The expression of the chick *Mesp2* homolog, *meso1*, was altered in Blebbistatin- (n=9/11)  
128 and RockOut-treated explants (n=10/10; Figure 1 D, d-f). *meso1* expression was either absent,  
129 located more rostrally or presented a different number of bands of expression, clearly indicating  
130 that the normal cycles of activation and suppression of *meso1* in the rostral PSM were altered.  
131 Importantly, *meso1* expression was also perturbed after 3 hours in culture with Blebbistatin or  
132 RockOut (n=8/9 and 5/5, respectively; Supplementary Figure 1 A-B), corresponding to an effect  
133 within two segmentation clock cycles. Furthermore, timely downregulation of *dll1* in the anterior-  
134 most PSM (Palmeirim et al., 1998), which normally occurs downstream of *Meso1/Mesp2* activity  
135 (Takahashi et al., 2000; Takahashi et al., 2003), was not observed in either Blebbistatin- (80%,  
136 n=8/10) or RockOut-treated (75%, n=6/8) explants after 10.5h of culture (Figure 1 D, g-i). Together  
137 these data indicate that interfering with actomyosin contractility perturbs three sequential events:  
138 the spatio-temporal expression dynamics of *hairy1*, timely *meso1* expression and the  
139 downregulation of *dll1* expression in the anterior-most PSM.

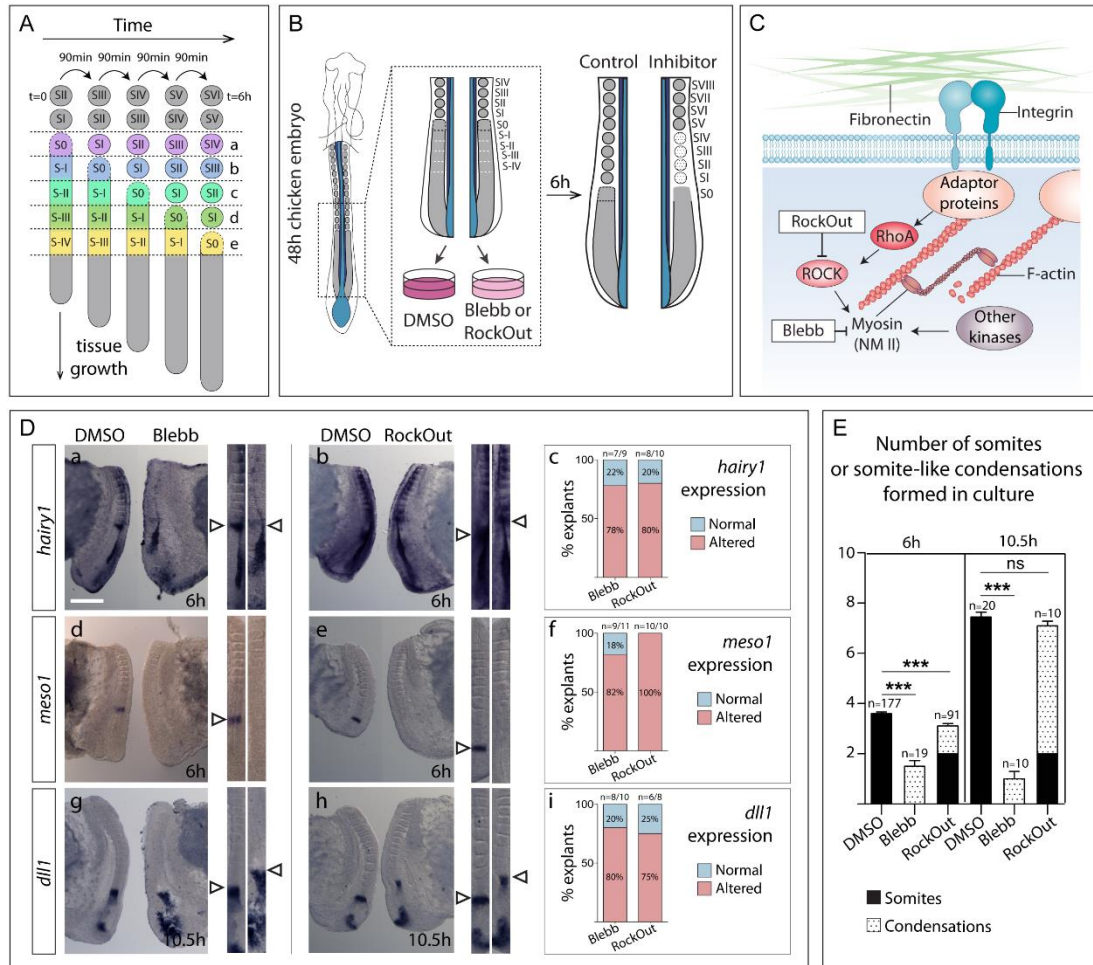

140

141 **Figure 1. Blocking NM II or ROCK I/II activity leads to misregulation of *hairy1*, *meso1* and *dll1* expression**  
 142 **and to defects in somite formation.**

143 **(A)** Schematic representation of chick PSM maturation and somite formation over time. A new pair of  
 144 somites buds off from the anterior PSM every 90 min. This is also the period of segmentation clock  
 145 oscillations in the chick embryo. With each new pair of somites, the previously formed somites mature (SI  
 146 becomes SII, SII becomes SIII, etc.). **(B)** Schematic representation of the explant culture system. Posterior  
 147 explants of HH11-14 chick embryos were bisected along the midline and cultured for 6 (or 10.5) hours. One  
 148 side of the explant was cultured with either Blebbistatin (Blebb) or RockOut, while the contra-lateral half  
 149 was cultured with an equal volume of DMSO. **(C)** Schematic representation of the action of Blebbistatin and  
 150 RockOut. Blebbistatin inhibits NM II ATPase activity directly while RockOut inhibits ROCK I/II-mediated  
 151 phosphorylation of myosin light chain, thus indirectly decreasing NM II ATPase activity. **(D)** *In situ*  
 152 hybridization for *hairy1* (a, b), *meso1* (d, e) and *dll1* (g, h) after 6 (a, b, d, e) or 10.5 hours of culture (g, h) in  
 153 Blebbistatin (Blebb; a, d, g) and in RockOut-containing (b, e, h) media. Straightened images of the respective  
 154 explant pairs (right) were aligned by SIV. Rostral is on top. Percentage of Blebbistatin- or RockOut-treated  
 155 explants with altered *hairy1*, *meso1* and *dll1* expression compared to the contralateral controls is shown in  
 156 c, f and i, respectively. **(E)** Number of somites (black bars) or somite-like condensations (dotted bars) formed  
 157 in cultured explants. Explants cultured with DMSO formed sharp somite boundaries and clearly  
 158 individualized somites. Blebbistatin-treated explants only formed 1-2 somite-like condensations. In RockOut  
 159 treated explants the first two somites were normal while the remaining ones were cell condensations with  
 160 poorly defined boundaries. p values were calculated using a paired Student's t-test. ns – not significant, \*\*\*  
 161 – p<0.01. Scale bar in D: 500  $\mu$ m. Bars - standard error of the mean.

162 Alterations in somite formation were observed concomitantly with the perturbations in  
163 *hairy1* and *meso1* expression. Control explants formed an average of 3.6 somites after 6 hours,  
164 consistent with a 90 min periodicity (Figure 1 E), while contralateral RockOut-treated explants  
165 formed 3.1 somites, of which only the first two somites were clearly individualized, while  
166 subsequent somite-like condensations were poorly defined (Figure 1 E). After 10.5 hours, control  
167 explants had formed an average of 7.5 somites, while RockOut-treated explants formed 7.1  
168 somites of which the first two appeared normal, but the remaining ones were ill-defined (Figure 1  
169 E). Importantly, explants cultured with Blebbistatin were unable to form more than 1-2 somite-  
170 like aggregates after 6 hours, or even 10.5 hours, of culture (Figure 1 E), evidencing an absolute  
171 requirement for NM II ATPase activity in somite formation. These effects were not due to an  
172 increase in apoptosis (Supplementary Figure 2 A-D).

173 Our data reveal a previously unknown role for NM II- and ROCK I/II-mediated cell  
174 contractility in the temporal regulation of the segmentation clock, *meso1* expression, *dll1*  
175 downregulation and, consequently, in somite formation.

176

#### 177 NM II activity is required for somite cleft formation and cell polarization

178 Somite formation involves a mesenchymal-to-epithelial transition (MET) of anterior PSM  
179 cells (Martins et al., 2009; Saga, 2012). To determine to what extent this process is impaired upon  
180 NM II or ROCK I/II inhibition, we performed a detailed analysis of the morphology of S0 to SIII in  
181 explants after a 6 hour culture period (regions e-b in Figure 1 A).

182 In control explants, S0 showed apically enriched N-cadherin (Figure 2 A, D) and some  
183 *zonula occludens* protein 1 (ZO-1) accumulation was observed apically (Figure 2 B, D, arrowheads).  
184 Peripheral cell alignment occurred (Figure 2 C, D) and fibronectin matrix was detected in the  
185 nascent somitic clefts (Figure 2 E, F, arrows). In contrast, in explants cultured with Blebbistatin, N-  
186 cadherin was homogeneous (Figure 2 G, J), ZO-1 immunostaining was absent (Figure 2 H, J) and  
187 neither peripheral cell alignment (Figure 2 I, J) nor fibronectin matrix accumulation within the



188 tissue was observed (Figure 2 K, L). Furthermore, the continuous and dense fibronectin matrix  
 189 observed surrounding the rostral PSM in control explants was disrupted in Blebbistatin-treated  
 190 explants (compare Figure 2 E and K, arrowheads). Moreover, the characteristic nuclear alignment  
 191 and F-actin apical enrichment observed in control SI (Supplementary Figure 3 A-C) was absent in  
 192 Blebbistatin-treated explants and no signs of somitic boundaries could be detected  
 193 (Supplementary Figure 3 D-F). We conclude that exposure of the S-IV and S-III regions of the PSM  
 194 (regions e and d in Figure 1 A) to Blebbistatin for 6 hours completely blocks their capacity to form  
 195 somites.

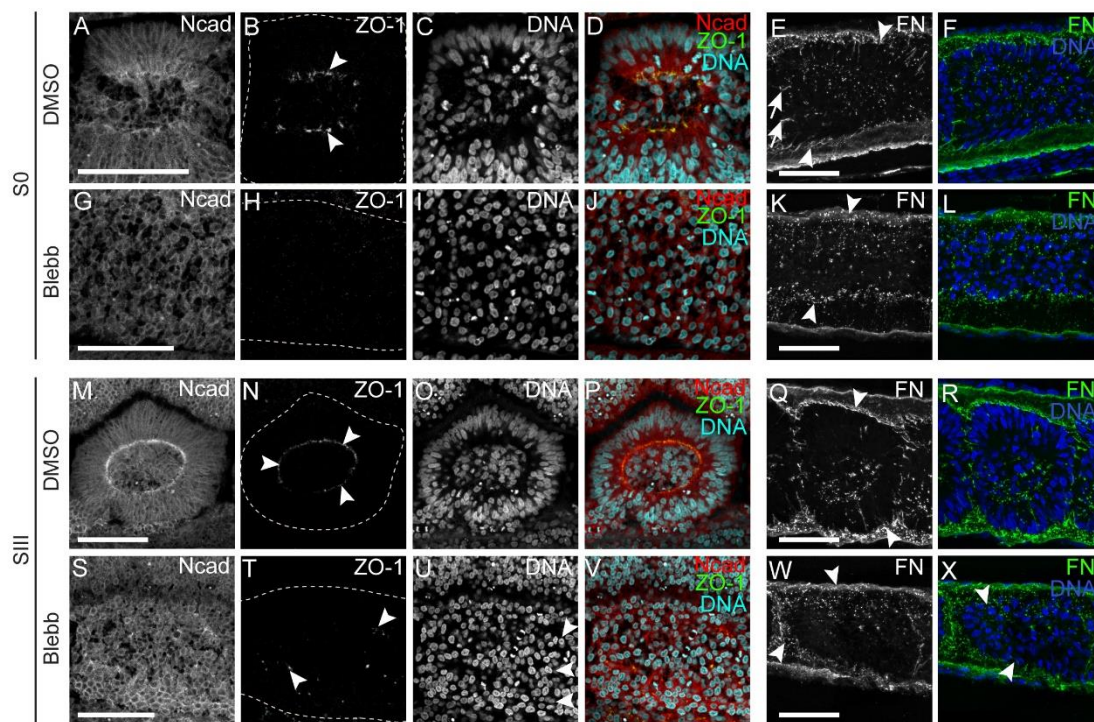

196  
 197 **Figure 2. NM II inhibition abolishes N-cadherin and ZO-1 polarization and impairs fibronectin**  
 198 **fibрилlogenesis.**

199 (A-X) Sagittal optical sections of control explants (A-F, M-R) and their Blebbistatin-treated contralateral  
 200 halves after 6 hours of culture, immunostained for N-cadherin (Ncad), ZO-1, fibronectin (FN), stained for  
 201 DNA and imaged at S0 (A-L; region e in Figure 1 A) and SIII (M-X; region b in Figure 1 A) levels. S0 of DMSO-  
 202 treated explants shows apically enriched N-cadherin (A) and ZO-1 (B, arrowheads) and peripheral nuclei are  
 203 aligned (C, D), while no signs of polarized cell-cell adhesions (G, H) or nuclear alignment (I, J) are found in  
 204 the contralateral Blebbistatin-treated explant. Apical polarization of N-cadherin and ZO-1 is maintained in  
 205 SIII cells of DMSO-treated explants (M, N, arrowheads), but no polarized N-cadherin (S) or ZO-1 (T,  
 206 arrowheads) are observed in contralateral Blebbistatin-treated halves. Nuclear alignment (U, arrowheads)  
 207 and fibronectin assembly around somites (K, W, arrowheads) are also deficient in Blebbistatin-treated  
 208 explants compared to contralateral controls (E, Q, arrowheads). Arrows in E show fibronectin assembly in  
 209 the nascent somitic cleft. Rostral to the left and dorsal on top. Dashed lines mark borders of S0 (B, H) and

210 SIII (N, T). FN – fibronectin. Ncad – N-cadherin. ZO-1 – *Zonula occludens* 1. Blebb – Blebbistatin. Scale bars:  
211 50  $\mu$ m.  
212

213 We next turned our attention to SII and SIII somites after 6 hours of culture. These were  
214 at stage S-II and S-I in the PSM, respectively (regions c and b in Figure 1 A), when the explants were  
215 placed in culture and had thus already upregulated *meso1* (Buchberger et al., 1998). As before, in  
216 the presence of Blebbistatin, apical enrichment of N-cadherin failed to occur (Figure 2 S, V), ZO-1  
217 was only detected in a few small foci (Figure 2 T, V) and, although a fibronectin matrix was present,  
218 it appeared less dense (Figure 2 W, X). An incipient nuclear alignment was sometimes observed  
219 (Supplementary Figure 3 K, arrowheads), but cells did not polarize their F-actin into apically  
220 enriched adhesion belts (compare Supplementary Figure 3 G-I with J-L). Epithelial tissues other  
221 than somites (e.g. ectoderm and neural tube) did not present significant alterations after  
222 incubation with Blebbistatin (Supplementary Figure 4). Altogether, these results point to an  
223 indispensable role for NM II activity for the MET underlying somite formation.

224 RockOut-treated explants also showed perturbations in somite formation, although to a  
225 lesser extent (Figure 1 E). When compared to control explants (Figure 3 A-D; Supplementary Figure  
226 5 A-C), RockOut treatment resulted in incomplete somitic clefts, such that S0 shared the  
227 somitocoel with S1 and sometimes also with SII (Fig 3 E-H, arrows, Supplementary Figure 5 D-F,  
228 arrows). In contrast to the accumulation of fibronectin in the nascent clefts in controls (Figure 3 B,  
229 arrow), no fibronectin was observed in the incipient somitic clefts of RockOut-treated explants  
230 (Figure 3 F, arrows). These results suggest that ROCK I/II activity in the S-IV and S-III regions of the  
231 PSM (regions e and d in Figure 1 A) is required for the formation of individualized somites. In  
232 contrast, when the rostral-most PSM (stage S-I before culture, region b in Figure 1 A) was exposed  
233 to RockOut for 6 hours, it was indistinguishable from control explants, showing apical  
234 accumulation of ZO-1 (Figure 3 I, M, arrowhead) and N-cadherin (Supplementary Figure 5, G, J),  
235 nuclear alignment (Figure 3, K, O, Supplementary Figure 5, H, K) and a complete, fibronectin

236 matrix-containing cleft (Figure 3 J, N). This indicates that ROCK I/II activity is not required for S-I to  
237 develop into a somite.

238 Altogether, our data indicate that intracellular actomyosin contractility plays a role in  
239 periodic somite cleft formation, and that ROCK I/II-independent NM II activity is essential for  
240 MET.

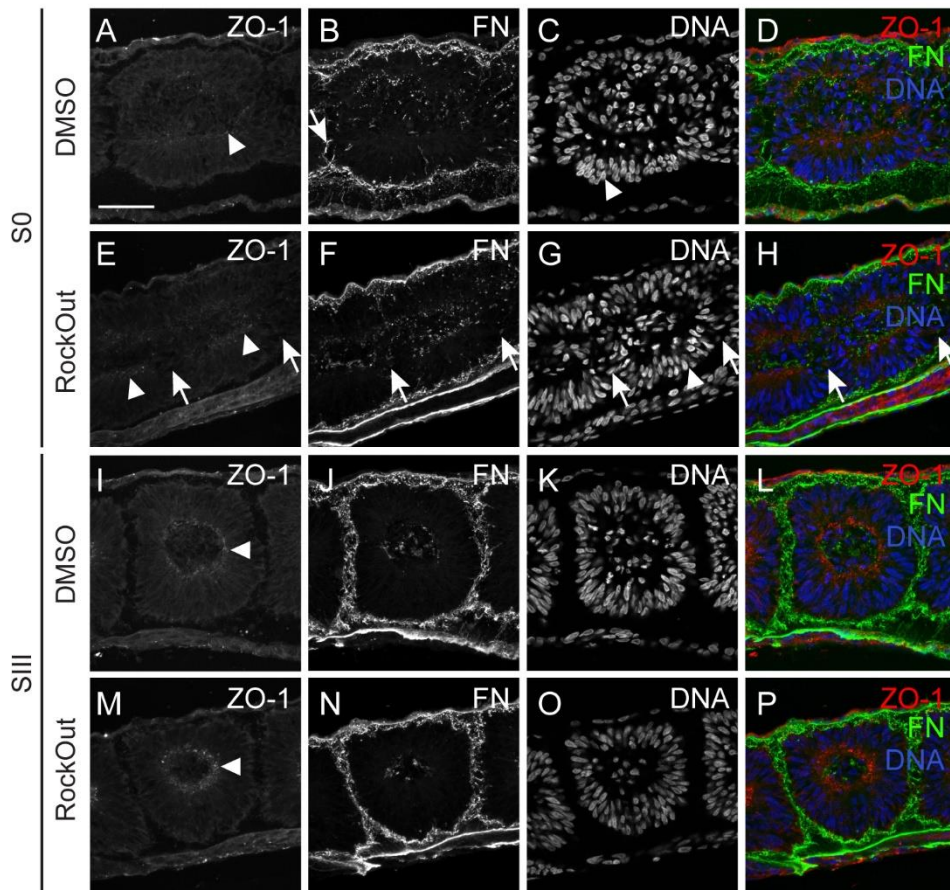

241 **Figure 3. ROCK I/II inhibition impairs morphological somite formation, leading to deficient ZO-1**  
242 **polarization and fibronectin assembly.**

243 (A-P) Sagittal sections of explants cultured in control (DMSO) medium (A-D, I-L) and their contralateral  
244 RockOut-treated halves (E-H, M-P) at S0 (A-H; region e in Figure 1 A) and SIII (I-P; region b in Figure 1 A)  
245 levels, immunostained for ZO-1 (first column), fibronectin (second column), stained for DNA (third column)  
246 and the respective merged image (fourth column). Explants were cultured for 6 hours. S0 in control explants  
247 show normal accumulation of ZO-1 (A, arrowhead), fibronectin assembly in the nascent cleft (B, arrow) and  
248 nuclear alignment (C, arrowhead). In contrast, S0 in contralateral RockOut-treated explants fails to form a  
249 clear cleft (E-H, arrows), although ZO-1 is generally polarized (E, arrowhead) and nuclei are aligned (G,  
250 arrowhead). At SIII level, both explants show normal ZO-1 polarization (I, M, arrowheads), fibronectin  
251 assembly (J, N) and nuclear alignment (K, O). Rostral on the left and dorsal on top. FN – fibronectin. ZO-1 –  
252 *Zonula occludens* protein 1. Scale bar: 50  $\mu$ m.

253

254 Blocking integrin-fibronectin binding perturbs segmentation clock oscillations and somitic cleft  
255 formation

256 Our next aim was to address the requirement for the fibronectin ECM surrounding the  
257 PSM in regulating segmentation clock oscillations and somite formation. PSM cells bind to the RGD  
258 motif of fibronectin through the  $\alpha 5\beta 1$  integrin, an interaction that plays a crucial role during  
259 somitogenesis (Girós et al., 2011; Yang et al., 1993).  $\alpha v$  integrins, which have been described to  
260 bind the RGD motif and partially compensate for the absence of the  $\alpha 5\beta 1$  integrin in the mouse  
261 (Yang et al., 1999), are not detected in the PSM of the chick embryo (Gomes de Almeida et al.,  
262 2016). We cultured embryo half explants in the presence of a linear RGD peptide, which competes  
263 with fibronectin for integrin binding (Huveneers et al., 2008; Pierschbacher and Ruoslahti, 1984),  
264 and compared them to contralateral control explants (Figure 4 A, B). RGD-treated explants formed  
265 ill-defined somite-like condensations, although in approximately the same number as the  
266 contralateral control (Figure 4 C). This was not due to cell death (Supplementary Figure 2 E-F).  
267 Concomitantly, RGD-treated explants displayed alterations in *hairy1* (Figure 4 D, a-c), *meso1*  
268 (Figure 4 D, d-f) and *dll1* expression patterns (Figure 4 D, g-i), evidencing that integrin-fibronectin  
269 interactions via RGD are required for proper segmentation clock oscillations, *meso1* positioning  
270 and timely downregulation of *dll1* in the anterior PSM.



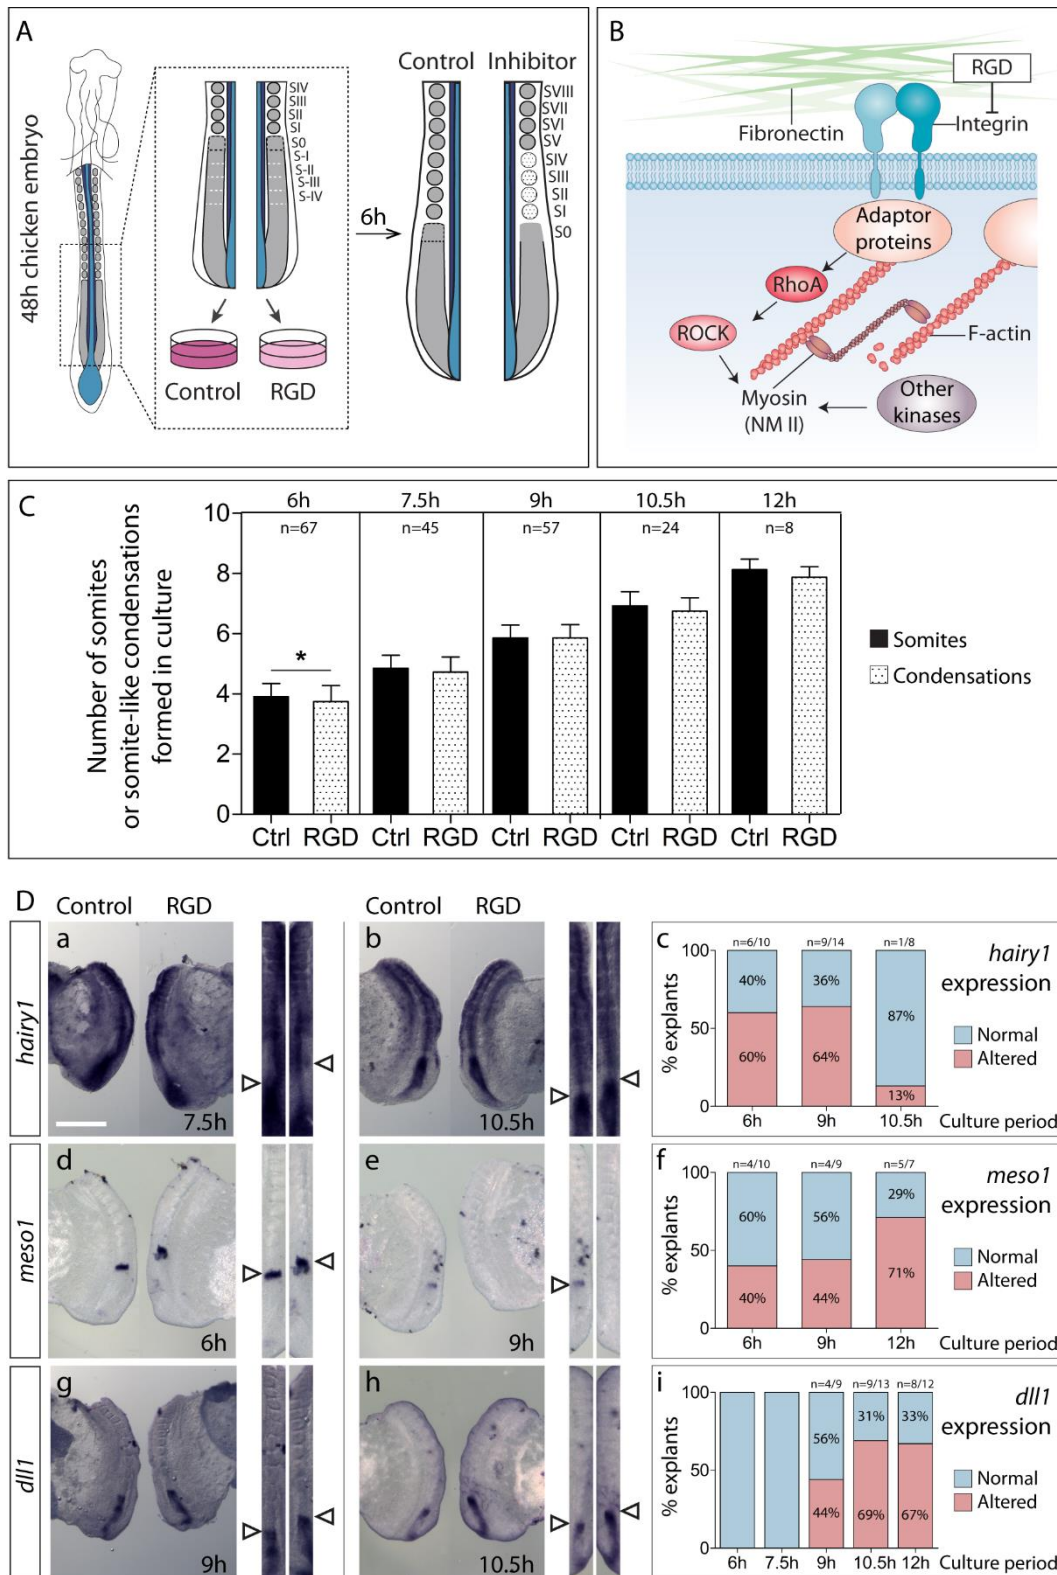

271  
272  
273  
274  
275  
276  
277  
278

**Figure 4. Integrin-fibronectin binding through RGD is required for timely *hairy1* and *meso1* expression and *dll1* downregulation.**

(A) Schematic representation of the explant culture system. Posterior explants of HH11-14 chick embryos were bisected along the midline and cultured for 6 to 12 hours. One side of the explant was cultured with RGD, while the contralateral half was cultured in control medium. (B) Schematic representation of the action of RGD. RGD competes with the RGD-binding pockets of integrins, interfering with their binding to the ECM. (C) Number of somites (black bars) or somite-like condensations (dotted bars) formed in culture in control

279 and RGD-treated explants. p values were calculated using a paired Student's t-test. \*p<0.05. **(D)** Expression  
 280 of *hairy1* (a, b), *meso1* (d, e) and *dll1* (g, h) in RGD-treated explants and contralateral controls at  
 281 representative timepoints of culture. Straightened images of respective explant pairs (right) aligned by SIV.  
 282 Rostral is on top. Percentage of RGD-treated explants with altered *hairy1*, *meso1* and *dll1* expression  
 283 compared to the contralateral controls is shown in c, f and i, respectively. Impairing integrin-fibronectin  
 284 binding with RGD alters *hairy1* and *meso1* expression relative to contralateral controls at 6 hours of culture  
 285 onwards (a-f, arrowheads). *dll1* expression was altered at 9 hours of culture onwards (g-i, arrowheads). Scale  
 286 bar: 500  $\mu$ m.  
 287

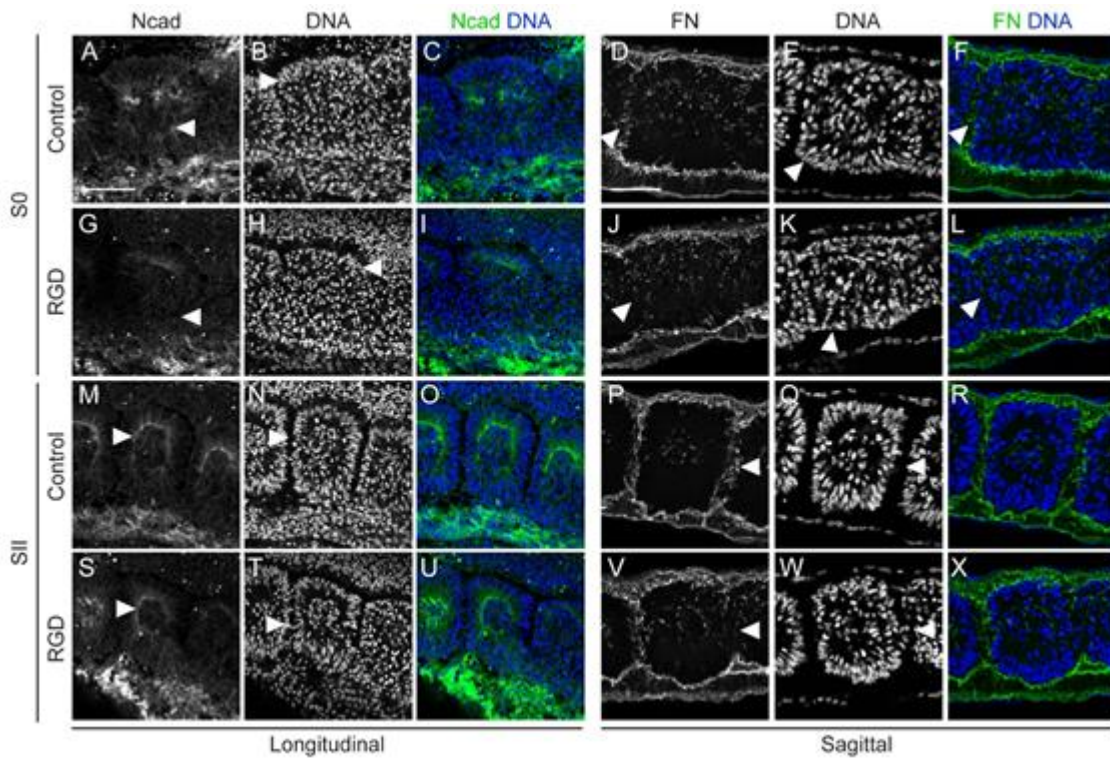

288  
 289 **Figure 5. Inhibition of integrin-fibronectin binding impairs somitic cleft formation.**  
 290 **(A-X)** Longitudinal (left) and sagittal (right) sections of explants cultured in control medium (A-F, M-R) and  
 291 their contralateral RGD-treated halves (G-L, S-X) at S0 (A-L; region e in Figure 1 A) and SII (M-X; region c in  
 292 Figure 1 A) levels, immunostained for N-cadherin (first column), fibronectin (fourth column) and stained for  
 293 DNA (second and fifth columns). Third and sixth columns show the respective merged images. Explants were  
 294 cultured for 6 hours. At the S0 level, control explants show normal apical accumulation of N-cadherin (A,  
 295 arrowheads) and nuclear alignment (B, E, arrowheads) in peripheral somitic cells as well as fibronectin  
 296 assembly in the nascent cleft (D, F, arrowheads). All of these are deficient in their RGD-treated contralateral  
 297 halves (G-L, arrowheads). At the level of SII, N-cadherin accumulation and nuclear alignment occurs normally  
 298 in both control and RGD-treated explants (M, N, S, T, arrowheads), but fibronectin assembly between  
 299 adjacent somites (P, V, arrowheads) and cleft formation (Q, W, arrowheads) are deficient in RGD-treated  
 300 explants compared to contralateral controls. Ncad – N-cadherin; FN – fibronectin. Scale bars: 50  $\mu$ m.

301           When compared to the contralateral control, the area corresponding to S0 after 6 hours  
302   of culture with RGD (region e in Figure 1 A) showed deficient nuclear alignment (Figure 5 B, E, H,  
303   K, arrowheads) and N-cadherin polarization (Figure 5 A, G, arrowheads), accompanied by deficient  
304   fibronectin assembly in the nascent cleft (Figure 5 D, J arrowheads). At the level of SII (region c in  
305   Figure 1 A), complete somite individualization was impaired in RGD-treated explants (Figure 5 N,  
306   Q, T, W, arrowheads) and, although N-cadherin polarization appeared normal (Figure 5 M, S,  
307   arrowheads), cleft formation (Figure 5 Q, W, arrowheads; R, X) and fibronectin assembly between  
308   adjacent somites was deficient (Figure 5 P, V, arrowheads; R, X).

309           These findings implicate cell-ECM interactions, mediated by integrin-fibronectin binding  
310   via the RGD motif, in temporal control of *hairy1* expression, correct positioning of *meso1*  
311   expression, downregulation of *dll1* in the anterior PSM and somite morphogenesis.

312

313   Impaired fibronectin matrix assembly results in altered segmentation clock dynamics, *meso1*  
314   expression and defects in somite morphogenesis

315           Another way to assess the relevance of the extracellular fibronectin matrix on the events  
316   leading up to somite formation is to perturb fibronectin assembly in the PSM and somites. To this  
317   end, primitive streak-stage embryos were electroporated with a construct expressing the 70kDa  
318   fibronectin fragment, a dominant-negative inhibitor of fibronectin matrix assembly (Figure 6 A, B;  
319   McKeown-Longo and Mosher, 1985; Sato et al., 2017). 70kDa-electroporated embryos exhibited a  
320   disrupted fibronectin matrix, composed of thinner fibrils when compared to control pCAGGs-  
321   electroporated embryos (Supplementary Figure 6 A; also see Figure 7 A, B). These embryos  
322   displayed multiple morphological defects, including kinked neural tube and detached tissues as  
323   well as perturbations in somite morphogenesis, which are all reminiscent of phenotypes obtained  
324   in previous studies interfering with fibronectin matrix deposition and/or with fibronectin-integrin  
325   binding (Supplementary Figure 6 B, C; Drake et al., 1992; Drake and Little, 1991; George et al.,  
326   1993; Girós et al., 2011; Takahashi et al., 2007). Although the average number of somite-like

327 structures formed in 70kDa-electroporated embryos was similar to the number of somites in  
328 controls (Figure 6 C), the former were ill-defined, often appearing fused or crammed  
329 (Supplementary Figure 6 B e-f, C), closely resembling the somite-like condensations formed in  
330 RockOut- and RGD-treated explants (Figures 3 and 5).

331           Next, we sought to evaluate the impact of inhibiting fibronectin matrix assembly on the  
332 molecular machinery underlying somite formation. Unilateral electroporation of the 70kDa  
333 fragment was performed (Figure 6 A) to allow the direct comparison of gene expression patterns  
334 within the same embryo. We observed a significant increase in the frequency of perturbations in  
335 the expression of embryonic clock genes *hairy1* ( $p<0.01$ ) and *hairy2* ( $p<0.05$ ), as well as in *meso1*  
336 ( $p<0.01$ ) and *dll1* ( $p<0.01$ ) expression, when compared with embryos electroporated with pCAGGs  
337 alone (Figure 6 D).



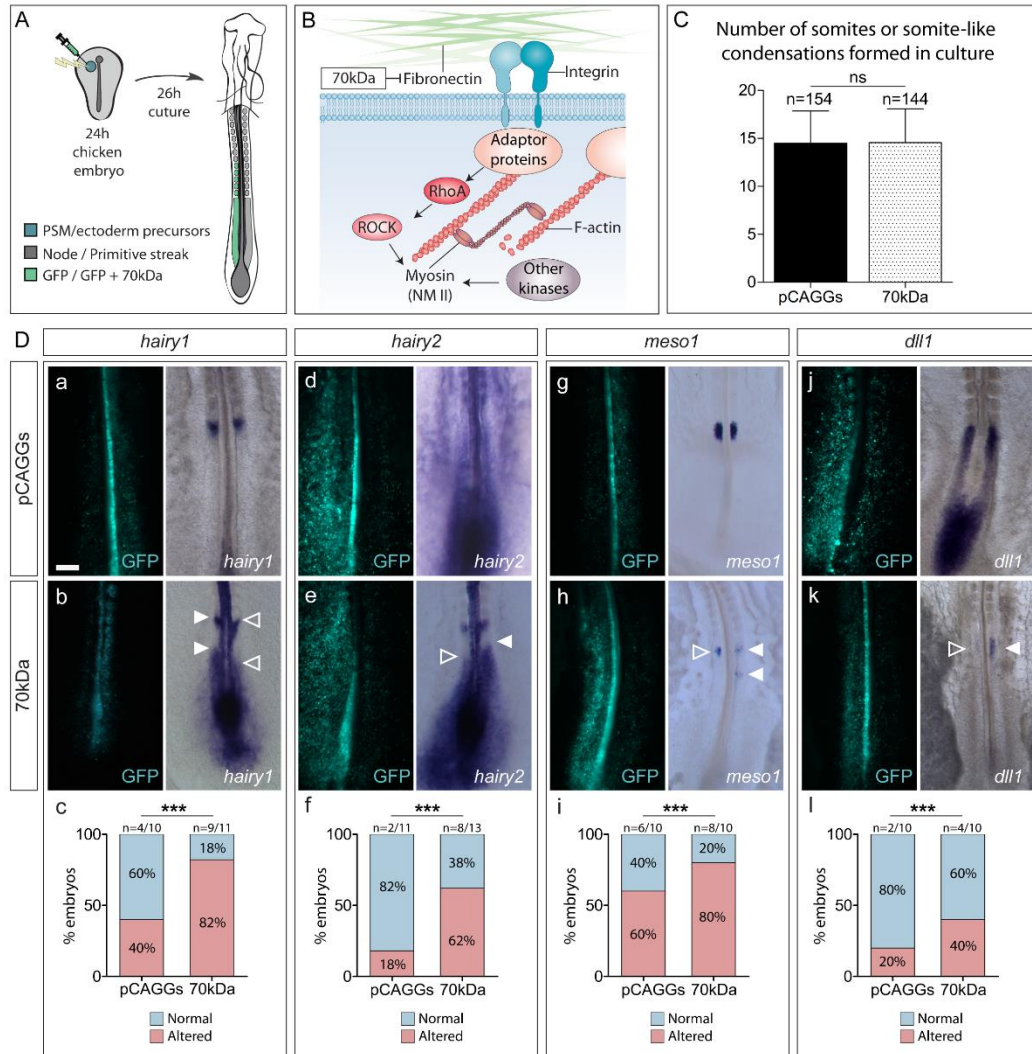

338

339

340

341

342

343

344

345

346

347

348

349

350

351

352

353

354

355

356

**Figure 6. Impairing fibronectin assembly by electroporation with a 70kDa expressing vector perturbs segmentation clock oscillations, timely *meso1* expression and *dll1* downregulation.**

(A) Schematic representation of the electroporation strategy. PSM/ectoderm progenitors of primitive-streak stage embryos were electroporated with either a pCAGGs GFP-expressing vector (pCAGGs) alone, or co-electroporated with a 70kDa-expressing vector (70kDa) and were incubated for about 26 hours. (B) Schematic representation of the action of 70kDa. 70kDa disrupts the assembly of fibronectin matrix by competitively binding to the N-terminal self-assembly domains of the protein, impairing fibronectin fibril formation. (C) Number of somites (black bars) or somite-like condensations (dotted bars) formed in pCAGGs- and 70kDa-electroporated embryos after 26 hours. p values were calculated using a paired Student's t-test. (D) Examples of the expression of *hairy1* (a-b), *hairy2* (d-e), *meso1* (g-h) and *dll1* (j-l) in pCAGGs- (top row) and 70kDa-electroporated embryos (middle row). Electroporated side is on right (a, b, g) or left (d, e, h, j, k). Perturbing the assembly of fibronectin on one side of the PSM leads to an asymmetric pattern of *hairy1* (b, arrowheads), *hairy2* (e, arrowheads), *meso1* (h, arrowheads) and *dll1* expression (k, arrowheads) in a higher percentage of embryos than in controls. Percentage of pCAGGs- and 70kDa-electroporated embryos with asymmetric expression of *hairy1*, *hairy2*, *meso1* and *dll1* between the electroporated PSM and the contralateral non-electroporated control PSM is shown in c, f, i and l, respectively. The number of embryos with an asymmetric pattern was significantly higher in 70kDa-electroporated embryos for all four genes studied. p values were calculated using a Chi-square test. \*\*\* p<0.01. Rostral is on top. Scale bar: 200  $\mu$ m.

357 Consistent with these data, 70kDa-electroporated embryos have deficiencies in somite  
358 morphogenesis which, in severe cases, leads to incomplete somitic clefts (Figure 7 A, B k, w,  
359 arrows). Peripheral cells of nascent somites of 70kDa-electroporated embryos did, however,  
360 accumulate ZO-1 apically (Figure 7 B e, h, i, l) which was maintained as the somites matured (Figure  
361 7 B q, u, t, x). Nevertheless, these somites were abnormal in shape and appeared smaller in  
362 severely affected embryos (Figure 7 B, i-l, u, x). In fact, the SI of the electroporated sides of 70kDa-  
363 treated embryos were significantly smaller in width than those of the contralateral control, while  
364 SV was significantly shorter in length (n=151; Supplementary Figure 7). In addition to defects in  
365 somite morphology, the ectoderm and endoderm were separated from the paraxial mesoderm in  
366 70kDa-electroporated embryos, indicating that their fibronectin matrix was insufficient to hold  
367 these tissues together (brackets in Figure 7 B g, k, s, w).

368 We conclude that proper fibronectin matrix assembly in the PSM is required for timely  
369 clock gene expression dynamics, positioning of *meso1* expression and *dll1* downregulation in the  
370 rostral-most PSM, as well as for the complete separation and morphogenesis of somites.

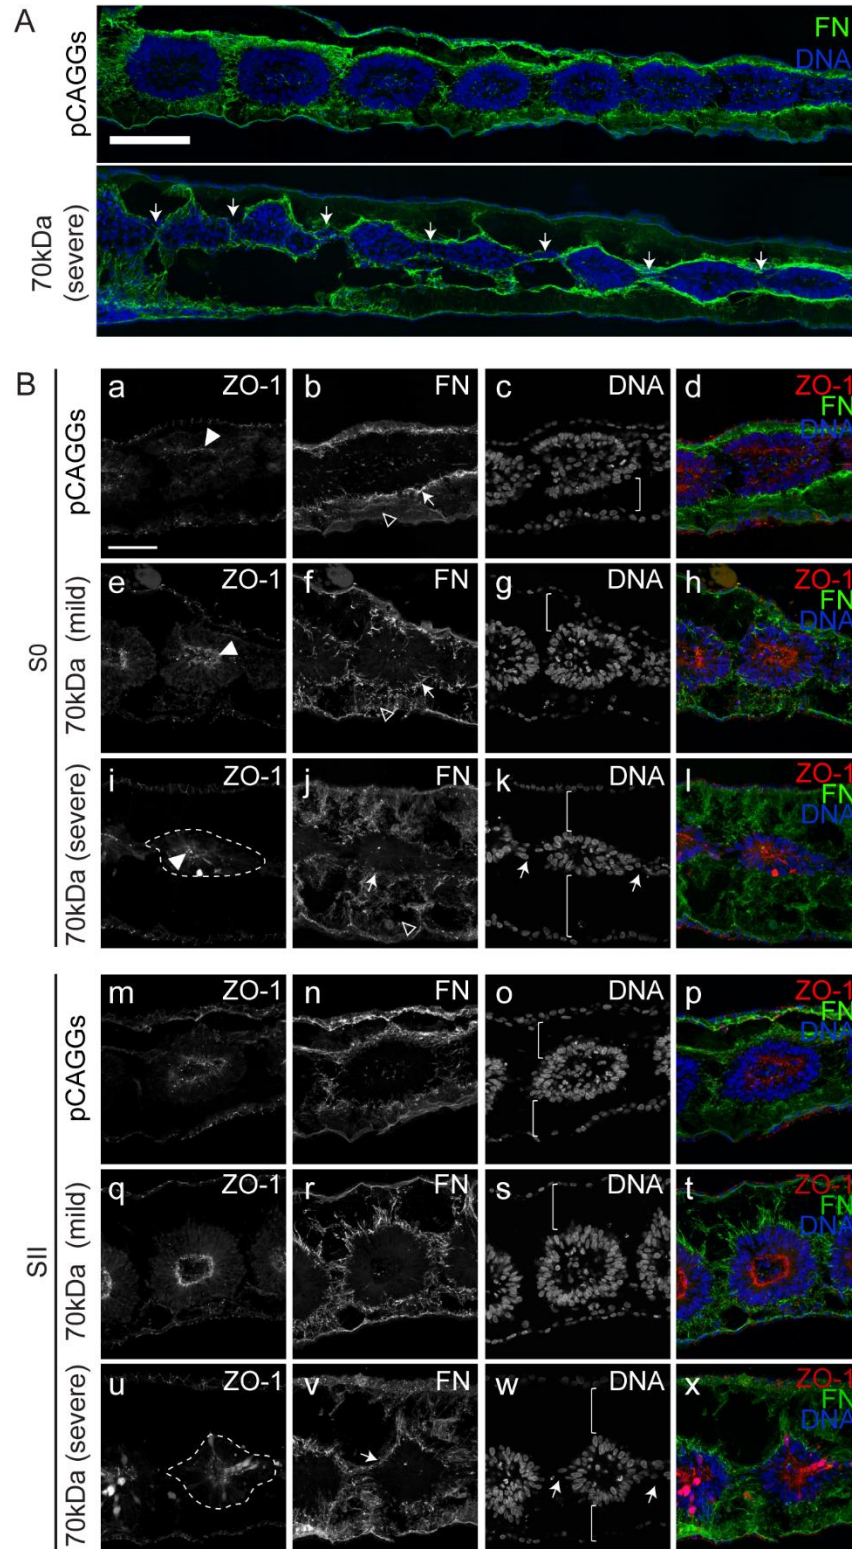

371  
372  
373  
374  
375  
376  
377  
378

**Figure 7. Somite morphology of 70kDa-electroporated embryos is severely compromised.**

**(A)** Sagittal sections of embryos electroporated with pCAGGs and 70kDa, the latter with a severe phenotype. Arrows point to deficient somitic clefts. Rostral to the left and dorsal on top. **(B)** Sagittal views of embryos electroporated with pCAGGs (a-d, m-p) and 70kDa (e-l, q-x) with either mild (e-h, q-t) or severe (i-l, u-x) phenotypes, at S0 (a-l) and SII (m-x) levels, immunostained for ZO-1 (first column) and fibronectin (second column) and stained for DNA (third column). Fourth column shows the merge of the respective channels. S0 of pCAGGs- and 70kDa-electroporated embryos all polarize ZO-1 normally (a, e, i, arrowheads) and this is

379 maintained at SII levels (m, q, u), but the fibronectin matrix surrounding the somites of 70kDa-treated  
380 embryos is disrupted compared to pCAGGs-electroporated embryos (b, f, j, v, arrows). Somites of 70kDa-  
381 electroporated embryos are also severely detached from both the ectoderm and endoderm compared to  
382 embryos electroporated only with pCAGGS (third column, brackets), and the fibronectin matrix connecting  
383 the endoderm to the somites is severely compromised (second column, empty arrowheads). Somites of  
384 embryos electroporated with 70kDa with more severe defects also fail to fully detach from adjacent somites  
385 (k, w, arrows). Rostral to the left and dorsal to the top. Dashed lines indicate altered somite morphology.  
386 Experiments were performed in 6 (pCAGGs) and 7 (70kDa) biological replicates. FN – fibronectin. ZO-1 –  
387 *Zonula occludens* protein 1. Scale bars: 50  $\mu$ m.  
388

389

## 390 **Discussion:**

### 391 Fibronectin-dependent tissue mechanics coordinate segmentation clock dynamics and cleft 392 formation

393 We have identified fibronectin-dependent tissue mechanics as a regulator of  
394 segmentation clock gene expression and the positioning of the presumptive somitic cleft in the  
395 chick embryo. Four independent treatments interfering with the mechanical properties of the PSM  
396 (Figure 8 A) consistently lead to asymmetric patterns of *hairy1* expression as well as incorrect  
397 positioning of *meso1* expression on the experimental versus the control sides of the same embryo.  
398 The similarity of the phenotypes obtained in experiments impairing fibronectin fibrillogenesis, cell-  
399 fibronectin interactions via RGD and blocking ROCK (Figure 8 B) suggests that the fibronectin  
400 matrix, the RGD-binding  $\alpha 5\beta 1$  integrin, and ROCK-dependent actomyosin contractility are part of  
401 the same pathway. The  $\alpha 5\beta 1$  integrin can transduce mechanical signals by ROCK activation  
402 (Schiller et al., 2013) and this requires the binding of  $\alpha 5\beta 1$  to two sites of fibronectin, namely the  
403 RGD and the synergy site (Friedland et al., 2009). Surprisingly, although the RGD site of fibronectin  
404 is crucial for somitogenesis (Girós et al., 2011), removing the synergy site of fibronectin (*Fn1<sup>syn/syn</sup>*)  
405 had no effect on mouse embryonic development (Benito-Jardón et al., 2017). However, cells  
406 expressing  $\alpha v$ -integrins form strong adhesions on fibronectin lacking the synergy site and can  
407 compensate for the inability of  $\alpha 5\beta 1$  to mediate adhesion strengthening on this fibronectin  
408 (Benito-Jardón et al., 2017), and  $\alpha v$ -integrins can partially compensate for the complete absence

409 of  $\alpha 5\beta 1$  during mouse somitogenesis (Yang et al., 1999). Alternatively, ROCK can be activated  
410 indirectly, for example through cadherin engagement and subsequent adherens junction  
411 formation (Burute and Thery, 2012; Schwartz and DeSimone, 2008), which occurs upon  
412 fibronectin-induced polarization of peripheral PSM cells (Martins et al., 2009).

413 It is well established that Notch signaling plays a role in the segmentation clock and is also  
414 required for timely *meso1* activation (Saga, 2012). Hence, the mechanical environment may be  
415 regulating Notch signaling in the PSM. In agreement with our results, chicken embryos  
416 electroporated with RNAi constructs against integrin  $\beta 1$  showed alterations in *hairy2*, *lnfg* and  
417 *meso1* expression in the PSM (Rallis et al., 2010). Mouse embryos where the fibronectin RGD site  
418 has been substituted with an RGE sequence (*Fn1*<sup>RGE/RGE</sup>) also showed asymmetric and/or  
419 dampened expression of *lnfg* and *Hes7* in the PSM (Girós et al., 2011) and *EphA4*, a direct target  
420 of *Mesp2* in the anterior PSM (Nakajima et al., 2006), was diffusely expressed or absent (Girós et  
421 al., 2011). Finally, combined roles of integrin  $\alpha 5\beta 1$  and Notch are required for zebrafish  
422 somitogenesis (Jülich et al., 2005).

423 Exactly how tissue mechanics regulate Notch signaling is unknown. It is becoming  
424 increasingly clear that mechanics play a crucial role in Notch activation (Gordon et al., 2015; Luca  
425 et al., 2017; Meloty-Kapella et al., 2012) and sustained Notch signaling in the *Drosophila* notum  
426 requires actomyosin contractility in both signal sending and receiving cells (Hunter et al., 2019).  
427 Intriguingly, clock oscillations in mouse tailbud PSM explants cultured on fibronectin are sustained  
428 in the presence of a ROCK inhibitor, suggesting that ROCK activity must be low for the maintenance  
429 of clock oscillations and that an increase in ROCK activity normally stops segmentation clock  
430 oscillations in this system (Hubaud et al., 2017). Moreover, in the same study, cell adhesion to  
431 fibronectin was linked to nuclear localization of Yes-associated protein (YAP), an intracellular  
432 sensor of cell mechanics, and dampening and eventual arrest of *lnfg* oscillations was found to be  
433 YAP-dependent (Hubaud et al., 2017). ROCK-mediated actomyosin contractility is known to  
434 promote the nuclear localization of YAP in several cell types (Piccolo et al., 2014) and YAP-null



435 mouse mutants (Morin-Kensicki et al., 2006) have a phenotype very similar to that of integrin  $\alpha 5$ -  
436 null mutants (Yang et al., 1993) and *Fn1*<sup>RGE/RGE</sup> embryos (Girós et al., 2011), suggesting that they  
437 contribute the same processes during early embryo development. Thus, it is conceivable that  
438 increased fibronectin-dependent tissue cohesion may translate into increased ROCK activity and  
439 actomyosin contractility, promoting sustained Notch signaling and nuclear localization of YAP,  
440 leading to the dampening and eventual arrest of clock oscillations. Further studies are needed to  
441 test this hypothesis.

442 Altogether, our results show that perturbation of the normal PSM tissue mechanics leads  
443 to a dysregulation of segmentation clock oscillations and the mispositioning of the segmental  
444 border, indicating that the mechanical properties of the PSM modulate Notch signaling and  
445 coordinate the translation of clock oscillations into periodic segmental border formation.

446

#### 447 Somite cleft formation and cell epithelialization have different mechanical requirements

448 In the rostral PSM, *Mesp2*/*Meso1* activates the expression of *EphA4*, which interacts with  
449 *EphrinB2* in cells rostral to the presumptive cleft, causing cell-cell repulsion and the formation of  
450 an incipient cleft (Nakajima et al., 2006; Watanabe et al., 2009). Then, fibronectin matrix assembly  
451 within the cleft stabilizes it (Jülich et al., 2015; Rifes and Thorsteinsdóttir, 2012) and promotes the  
452 epithelialization of cells rostral to the cleft (Martins et al., 2009). This can be defined as the first  
453 step of morphological somite individualization. The second step is defined as the complete  
454 epithelialization of the remaining cells of the nascent somite and lasts until SII, when all somitic  
455 cells have acquired a spindle-like shape and are organized into a rosette (Martins et al., 2009).

456 *RockOut*-, RGD- and 70kDa-treated embryos (Figure 8 A, B) all show perturbations in  
457 segmentation clock gene expression, abnormal positioning of *meso1* and defects in the somitic  
458 clefts. Although somite morphology is also perturbed, the acquisition of the spindle-shape cell  
459 morphology which occurs as S0 develops into SII does not appear to be significantly perturbed.  
460 Thus, the first step of morphological somite formation is affected but the second step is not. In

461 contrast, Blebbistatin-treated explants not only have the defects listed above, but cells that had  
462 already upregulated *meso1* before the addition of the drug and formed an incipient cleft during  
463 culture, were completely unable to epithelialize. In fact, Blebbistatin-treated explants formed only  
464 1 or 2 somites, and their cells did not acquire the elongated, spindle-shape typical of SI and SII  
465 somites. Hence, Blebbistatin affects both steps of morphological somite formation.

466         RockOut targets NM II activity indirectly by inhibiting ROCK I and II, two of the kinases that  
467 activate NM II (Newell-Litwa et al., 2015). In contrast, Blebbistatin directly targets the NM II  
468 ATPase. Our results thus raise the possibility that the acquisition of the spindle-shaped  
469 morphology of cells may be dependent on another NM II activator. Interestingly, Ca<sup>++</sup>/calmodulin  
470 signaling can activate NM II and inhibiting calmodulin was shown to block the acquisition of this  
471 morphology during chick somitogenesis (Chernoff and Hilfer, 1982).

472

473 A gradient of fibronectin-dependent tissue mechanics as a player in the PSM wavefront of  
474 maturation

475         While the waves of Notch oscillatory activity travel through the entire length of the PSM,  
476 they are only translated into segments in the anterior-most region of the tissue. Opposing  
477 gradients of Fgf/Wnt and Retinoic acid (RA) in the PSM are thought to define the wavefront, which  
478 marks the region where PSM cells become competent for somite formation (Hubaud and  
479 Pourquié, 2014). Rostral to the wavefront, segmentation clock oscillations progressively slow  
480 down until they reach a halt and cells become part of a somite (Palmeirim et al., 1997).

481         Herein, we propose a model (Figure 8 C) where a posterior to anterior gradient of  
482 fibronectin-dependent tissue cohesion is interpreted by the PSM cells as an increasing gradient of  
483 mechanical tension (Figure 8 C). We propose that the fibronectin-dependent tensional state of the  
484 PSM at the level of the wavefront acts as a threshold that activates a mechanotransduction  
485 signaling cascade, ensuring the correct spatio-temporal conversion of the cyclic expression of  
486 segmentation clock genes into periodic *meso1* expression, which in turn defines the next somitic

487 cleft (Figure 8 C). In support of this hypothesis, a gradient of increasing paraxial mesoderm stiffness  
488 from the tail to rostral somites has been identified in the chick embryo (Bénazéraf et al., 2017;  
489 Marrese et al., 2019). During its maturation, the PSM thus integrates a combination of chemical  
490 and mechanical signals, namely gradients of Fgf/Wnt and RA (Aulehla and Pourquié, 2010) and,  
491 simultaneously, a progressive increase in fibronectin-dependent tissue cohesion (Figure 8 C).  
492 Fibronectin matrix-dependent tissue mechanics would thus be a key contributor to the PSM  
493 wavefront of maturation in that it regulates where and when the next somitic cleft is positioned  
494 in the anterior PSM (Figure 8 C). Hence, we propose that a mechanotransduction pathway  
495 downstream of fibronectin plays a major role in the translation of cyclic waves of expression of  
496 segmentation clock genes into the periodic morphogenesis of somites.



497

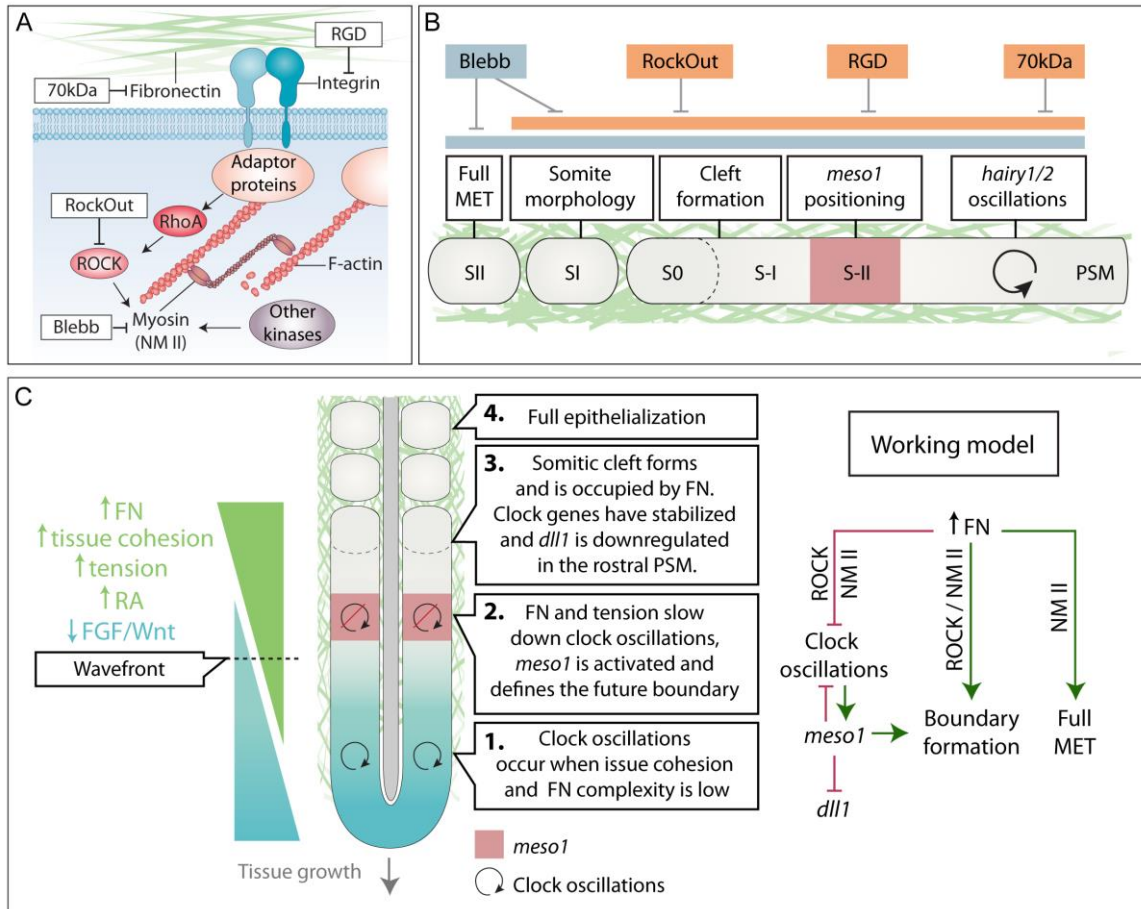

498

499

500

**Figure 8. Working model illustrating a fibronectin-dependent mechanotransduction pathway in chick somite formation.**

501

502

503

504

505

506

507

508

509

510

511

512

513

514

**(A)** Schematic representation of the targets of experimental inhibition used in this study. **(B)** Effect of the different treatments on somitogenesis. Interfering with NM II (Blebb) or ROCK I/II (RockOut) activity, integrin-fibronectin binding (RGD), or fibronectin matrix assembly (70kDa), leads to altered segmentation clock dynamics, misregulated *meso1* expression, impaired or deficient cleft formation and alterations in somite morphology. Interfering directly with NM II further disrupts full somite epithelialization. **(C)** Working model proposing that an increase of fibronectin matrix complexity and tissue cohesion in the PSM, from caudal to rostral, is sensed by cells as a tensional gradient, with anterior PSM cells being in the stiffest environment. This increased tensional gradient occurs concomitantly with a decrease in Fgf/Wnt levels and an increase in RA. As cells reach the wavefront and sense a threshold of stiffness (due to fibronectin-dependent tissue cohesion), ROCK activity is increased and so is actomyosin contractility. This in turn slows down clock oscillations and stabilizes Notch signaling, which activates *meso1* expression in the S-II/S-I region, setting the stage for cleft formation and *dll1* downregulation in the rostral-most PSM later on. As the clefts form, somites bud off as SI. Finally, ROCK-independent NM II activity is required for full somite epithelialization into SII.

515 **Materials and Methods:**

516 Embryos

517 Fertilized chicken (*Gallus gallus*) eggs were obtained from commercial sources (Sociedade  
518 Agrícola Quinta da Freiria or Pintobar Exploração Avícola, Lda, Portugal) and incubated at 37.5°C  
519 in a humidified chamber until the desired HH stage (HH4 or HH11-14; Hamburger and Hamilton,  
520 1992). Somite nomenclature is according to Pourquié and Tam (2001).

521

522 Embryo explant culture and chemical treatments

523 Explant tissues of HH11-14 embryos were collected and cultured as previously described  
524 (Palmeirim et al., 1997; Rifes et al., 2007). Embryos were bisected along the midline and then cut  
525 transversally rostral to somites IV and Hensen's node. The two contralateral halves thus retained  
526 half of the neural tube and notochord as well as the first four somites and the PSM, with all  
527 remaining neighboring tissues intact. Explants were placed on top of a polycarbonate filter floating  
528 on M199 medium supplemented with 10% chick serum, 5% fetal calf serum and 100 U/ml of  
529 penicillin and streptomycin (Palmeirim et al., 1997). Explants were then cultured at 37°C with 5%  
530 CO<sub>2</sub> from 6 to 12 hours.

531 InSolution™Blebbistatin (Calbiochem) and RockOut (Calbiochem) diluted in DMSO were  
532 used at a final concentration of 50 µM in culture medium. Equal volumes of DMSO (Sigma-Aldrich)  
533 were used as control for both drugs. The linear RGD peptide (GRGDS - G4391, Sigma) was diluted  
534 in culture medium and used at 0.9 mM, while control explants were cultured in medium only. RGD  
535 peptide efficiency was confirmed in a cell adhesion assay (Danen et al., 2002; Pierschbacher and  
536 Ruoslahti, 1984) before using it on explants.

537

538 Embryo electroporation and *ex ovo* culture

539 HH4-5 embryos were electroporated on one (randomly selected) side of the primitive  
540 streak in the presumptive PSM and/or ectoderm and cultured *ex ovo* using the Early Chick culture

541 method (Chapman et al., 2001). The electroporation mixture contained plasmid DNA at 0.5-1  $\mu\text{g}/\mu\text{l}$   
542 mixed with 0.4% Fast Green for visualization. Embryos were submerged in an electroporation  
543 chamber filled with Tyrode's saline and three pulses of 6-9 V, 50 ms each, at 350 ms intervals were  
544 applied. Control embryos were electroporated with pCAGGs containing a GFP reporter (pCAGGs-  
545 GFP; abbreviated pCAGGs). pCAGGs-70kDa qFN1 was kindly provided by Yuki Sato (Sato et al.,  
546 2017) and was co-electroporated with the pCAGGs-GFP plasmid in experimental embryos  
547 (treatment abbreviated 70kDa). Electroporated embryos were screened for GFP after fixation to  
548 select embryos with an intense signal on only one side to process for whole mount morphological  
549 analysis, *in situ* hybridization experiments and transverse sectioning. For morphological analysis in  
550 sagittal sections, the embryo side electroporated with pCAGGs was compared to the 70kDa-  
551 electroporated side of other same stage embryos.

552

### 553 Cryosectioning and immunohistochemistry

554 Cryosectioning was performed on embryo explants and whole embryos fixed in 4%  
555 paraformaldehyde in 0.12 M phosphate buffer containing 4% sucrose and processed for  
556 cryoembedding. Fixed samples were washed in 0.12 M phosphate buffer with 4% and 15% sucrose  
557 and then embedded in 7.5% gelatin in 0.12 M phosphate buffer containing 15% sucrose, frozen on  
558 dry ice-chilled isopentane and stored at  $-80^{\circ}\text{C}$  until sectioning. Cryostat sections (10-30  $\mu\text{m}$ ) were  
559 processed for immunofluorescence as previously described (Gomes de Almeida et al., 2016).  
560 Permeabilization of sections was performed with 0.2% Triton-X100 in phosphate buffered saline  
561 (PBS). 5% bovine serum albumen (BSA) or a combination of 1% BSA and 10% Normal Goat Serum  
562 (NGS) in PBS were used for blocking depending on the presence or absence of anti-fibronectin  
563 antibodies, respectively. Primary and secondary antibodies were diluted in 1% BSA in PBS. Sections  
564 were incubated with primary antibodies overnight at  $4^{\circ}\text{C}$  and with secondary antibodies for 1 hour  
565 at room temperature. For whole-mount immunodetection, explants were fixed in 4%  
566 paraformaldehyde in PBS and processed as previously described (Martins et al., 2009; Rifes and

567 Thorsteinsdóttir, 2012). 1% Triton-X100 in PBS was used for permeabilization and 1% BSA in PBS  
568 was used for blocking and antibody dilution. Antibody incubation was performed overnight at 4°C.  
569 The following primary antibodies were used: anti-ZO-1 (Zymed, #40-2200, 1:100 or  
570 Invitrogen, #33-9100, 1:100); anti-N-cadherin (BD Biosciences, #610920, 1:100); anti-fibronectin  
571 (Sigma, #F-3648, 1:400), anti-activated caspase3 (Cell Signaling, #9661, 1:1000) and anti-GFP  
572 (Invitrogen, #A11122, 1:100). For F-actin staining we used Alexa 488-conjugated phalloidin  
573 (Invitrogen, 1:40) and for staining DNA we used ToPro3 (Invitrogen, 1:500) in conjunction with  
574 ribonuclease A (Sigma, 10 µg/ml), 4% Methyl Green (Sigma, diluted 1:250; Prieto et al., 2015) or  
575 4',6-diamidino-2-phenylindole (DAPI, 5µg/ml in PBS with 0.1% Triton-X100). For detection of the  
576 primary antibodies the adequate secondary goat anti-mouse and anti-rabbit Alexa 488-, Alexa 568-  
577 or Alexa 546-conjugated F'ab fragments from Invitrogen were used (#A-11017, #A-21069, #A-  
578 11071, #A-11019, #A-11070, 1:1000). Immunohistochemistry was performed on at least 6  
579 different explants/embryos and the respective controls for each treatment (Blebbistatin n=13;  
580 RockOut n=15; RGD n=13; 70kDa n=7/pCAGGs n=6).

581

#### 582 *In situ* hybridization

583 *In situ* hybridization using DIG-labeled RNA probes was performed as described previously  
584 (Henrique et al., 1995) with minor alterations (Gomes de Almeida et al., 2016). RNA probes were  
585 synthesized from linearized plasmids: *dll1* (Henrique et al., 1995), *meso1* (Buchberger et al., 1998),  
586 *hairy1* (Palmeirim et al., 1997) and *hairy2* (Jouve et al., 2000).

587

#### 588 Statistical analysis

589 Paired Student's t-tests were performed to assess for differences in the number of somites  
590 formed in Blebbistatin-, RockOut- and RGD-treated explants relative to the respective controls,  
591 and in embryos electroporated with pCAGGs only and pCAGGs + 70kDa. Differences in the  
592 frequency of morphological and gene expression phenotypes found in 70kDa-electroporated

593 embryos compared to pCAGGs-electroporated control embryos was tested through a Chi-square  
594 test. Differences in somite size between pCAGGs- or 70kDa-electroporated sides compared to the  
595 control (non-electroporated) sides of embryos was tested through a nested ANOVA. The side in  
596 which the embryo was electroporated (left or right) was nested in the treatment (non-  
597 electroporated, pCAGGs-electroporated or 70kDa-electroporated) to account for a potential  
598 variability between the two sides. Statistical significance was set at  $p < 0.05$ . Statistical analyses  
599 were performed in Statistica 10 (<https://statistica.software.informer.com/10.0/>), Graphpad Prism  
600 5 (<https://graphpad-prism.software.informer.com/5.0/>) and RStudio (<https://rstudio.com/>).

601

#### 602 Sample preparation and imaging

603 Whole mount explants were gradually dehydrated in methanol and cleared in  
604 methylsalicylate (Sigma-Aldrich) as described previously (Martins et al., 2009; Rifes and  
605 Thorsteinsdóttir, 2012), except for phalloidin-labelled embryos and explants, where a shorter  
606 series of ethanol dehydration series was used. Cryostat sections were mounted in Vectashield  
607 (Vector Laboratories) or in 5mg/ml propyl gallate in glycerol/PBS (9:1) with 0.01% azide.  
608 Immunofluorescence images were taken on a confocal Leica SPE microscope, following imaging  
609 acquisition steps described previously (Rifes and Thorsteinsdóttir, 2012). Imaging of  
610 electroporated embryos and explants processed for *in situ* hybridization was performed using a  
611 Zeiss LUMAR V12 Stereoscope coupled to a Zeiss AxioCam 503 color 3MP camera. Image analysis  
612 was performed using Fiji v. 1.49 (<https://imagej.net/Fiji>) software. Image histogram corrections  
613 and, when appropriate, maximum intensity projections of immunofluorescence confocal stacks  
614 were produced in Fiji and exported as TIFF files. When applicable, contiguous images were stitched  
615 together into a single image using the pairwise stitching Fiji plugin (Preibisch et al., 2009). For the  
616 analysis of *in situ* hybridization patterns along the PSM explants, the Fiji plugin Straighten (Kocsis  
617 et al., 1991) was used.

618

619 **Acknowledgements:**

620 We thank Dr. Yuki Sato for generously sharing the pCAGGs-q70kDa construct and Inês Fragata for  
621 help with the statistical analysis. This work was supported by Fundação para a Ciência e a  
622 Tecnologia (FCT, Portugal) projects PTDC/SAU-OB/103771/2008, PTDC/BEXBID/5410/2014,  
623 UID/BIA/00329/2013, UID/BIM/04773/2019 CBMR, and FCT scholarships SFRH/BD/86980/2012  
624 (PGA) and SFRH/BD/37423/2007 (PR). Imaging and image analysis were done in the Microscopy  
625 Facility at the Faculty of Sciences of the University of Lisbon and the Light Microscopy Unit of  
626 CBMR-UAlg, nodes of the Portuguese Platform for BioImage (reference PPBI-POCI-01-0145-FEDER-  
627 022122). Finally, we are grateful to Isabel Palmeirim and all members of our laboratories for their  
628 support and helpful discussions.

629

630 **Competing interests:**

631 The authors declare no competing or financial interests.

632

633 **Author contributions:**

634 Conceptualization: P.G.A., P.R., R.P.A., S.T.; Methodology: P.G.A., P.R., R.P.A., S.T.;  
635 Validation: P.G.A, P.R., A.P.M.J., G.G.P., R.P.A., S.T.; Formal analysis: P.G.A.; Investigation: P.G.A.,  
636 P.R., A.P.M.J., G.G.P.; Resources: R.P.A., S.T.; Writing - original draft: P.G.A., S.T.; Writing - review  
637 & editing: P.G.A, P.R., A.P.M.J., G.G.P., R.P.A., S.T.; Visualization: P.G.A., P.R., R.P.A., S.T.;  
638 Supervision: R.P.A., S.T.; Project administration: P.G.A., R.P.A., S.T.; Funding acquisition: R.P.A., S.T.

639

640 **References:**

641 Aulehla A, Pourquié O. 2010. Signaling gradients during paraxial mesoderm development. *Cold*  
642 *Spring Harb Perspect Biol* **2**:1–17. doi:10.1101/cshperspect.a000869  
643 Bailey C, Dale K. 2015. Somitogenesis in Vertebrate Development.ELS. John Wiley & Sons, Ltd:  
644 Chichester. Chichester, UK: John Wiley & Sons, Ltd. pp. 1–15.

- 645           doi:10.1002/9780470015902.a0003820.pub2
- 646   Barriga EH, Franze K, Charras G, Mayor R. 2018. Tissue stiffening coordinates morphogenesis by  
647           triggering collective cell migration in vivo. *Nature* **554**:523–527. doi:10.1038/nature25742
- 648   Barrios A, Poole RJ, Durbin L, Brennan C, Holder N, Wilson SW. 2003. Eph/Ephrin signaling  
649           regulates the mesenchymal-to-epithelial transition of the paraxial mesoderm during somite  
650           morphogenesis. *Curr Biol* **13**:1571–82. doi:10.1016/j.cub.2003.08.030
- 651   Bénazéraf B, Beaupeux M, Tchernookov M, Wallingford A, Salisbury T, Shirtz A, Shirtz A, Huss D,  
652           Pourquié O, François P, Lansford R. 2017. Multi-scale quantification of tissue behavior  
653           during amniote embryo axis elongation. *Development* **144**:4462–4472.  
654           doi:10.1242/dev.150557
- 655   Bénazéraf B, Francois P, Baker RE, Denans N, Little CD, Pourquié O. 2010. A random cell motility  
656           gradient downstream of FGF controls elongation of an amniote embryo. *Nature* **466**:248–  
657           252. doi:10.1038/nature09151
- 658   Benito-Jardón M, Klapproth S, Gimeno-LLuch I, Petzold T, Bharadwaj M, Müller DJ, Zuchtriegel G,  
659           Reichel CA, Costell M. 2017. The fibronectin synergy site re-enforces cell adhesion and  
660           mediates a crosstalk between integrin classes. *Elife* **6**:1–24. doi:10.7554/elife.22264
- 661   Brunet T, Bouclet A, Ahmadi P, Mitrossilis D, Driquez B, Brunet A-C, Henry L, Serman F, Béalle G,  
662           Ménager C, Dumas-Bouchiat F, Givord D, Yanicostas C, Le-Roy D, Dempsey NM, Plessis A,  
663           Farge E. 2013. Evolutionary conservation of early mesoderm specification by  
664           mechanotransduction in Bilateria. *Nat Commun* **4**:2821. doi:10.1038/ncomms3821
- 665   Buchberger A, Seidl K, Klein C, Eberhardt H, Arnold HH. 1998. cMeso-1, a novel bHLH  
666           transcription factor, is involved in somite formation in chicken embryos. *Dev Biol* **199**:201–  
667           15. doi:10.1006/dbio.1998.8919
- 668   Burute M, They M. 2012. Spatial segregation between cell–cell and cell–matrix adhesions. *Curr*  
669           *Opin Cell Biol* **24**:628–636. doi:10.1016/j.ceb.2012.07.003
- 670   Campbell ID, Humphries MJ. 2011. Integrin structure, activation, and interactions. *Cold Spring*



- 671 *Harb Perspect Biol* **3**:a004994–a004994. doi:10.1101/cshperspect.a004994
- 672 Chan CJ, Heisenberg C-P, Hiiragi T. 2017. Coordination of morphogenesis and cell-fate  
673 specification in development. *Curr Biol* **27**:R1024–R1035. doi:10.1016/j.cub.2017.07.010
- 674 Chapman SC, Collignon J, Schoenwolf GC, Lumsden A. 2001. Improved method for chick whole-  
675 embryo culture using a filter paper carrier. *Dev Dyn* **220**:284–9. doi:10.1002/1097-  
676 0177(20010301)220:3<284::AID-DVDY1102>3.0.CO;2-5
- 677 Charras G, Yap AS. 2018. Tensile Forces and Mechanotransduction at Cell–Cell Junctions. *Curr*  
678 *Biol* **28**:R445–R457. doi:10.1016/j.cub.2018.02.003
- 679 Chernoff EA, Hilfer SR. 1982. Calcium dependence and contraction in somite formation. *Tissue*  
680 *Cell* **14**:435–49. doi:10.1016/0040-8166(82)90038-6
- 681 Christ B, Huang R, Scaal M. 2007. Amniote somite derivatives. *Dev Dyn* **236**:2382–2396.  
682 doi:10.1002/dvdy.21189
- 683 Danen EHJ, Sonneveld P, Brakebusch C, Fässler R, Sonnenberg A. 2002. The fibronectin-binding  
684 integrins  $\alpha 5\beta 1$  and  $\alpha \nu\beta 3$  differentially modulate RhoA-GTP loading, organization of cell  
685 matrix adhesions, and fibronectin fibrillogenesis. *J Cell Biol* **159**:1071–1086.  
686 doi:10.1083/jcb.200205014
- 687 Dequéant M-L, Glynn E, Gaudenz K, Wahl M, Chen J, Mushegian A, Pourquié O. 2006. A complex  
688 oscillating network of signaling genes underlies the mouse segmentation clock. *Science*  
689 **314**:1595–8. doi:10.1126/science.1133141
- 690 Drake CJ, Davis LA, Hungerford JE, Little CD. 1992. Perturbation of beta 1 integrin-mediated  
691 adhesions results in altered somite cell shape and behavior. *Dev Biol* **149**:327–38.  
692 doi:10.1016/0012-1606(92)90288-R
- 693 Drake CJ, Little CD. 1991. Integrins play an essential role in somite adhesion to the embryonic  
694 axis. *Dev Biol* **143**:418–21. doi:10.1016/0012-1606(91)90092-H
- 695 Friedland JC, Lee MH, Boettiger D. 2009. Mechanically activated integrin switch controls  
696  $\alpha 5\beta 1$  function. *Science* **323**:642–4. doi:10.1126/science.1168441



- 697 George EL, Georges-Labouesse EN, Patel-King RS, Rayburn H, Hynes RO. 1993. Defects in  
698 mesoderm, neural tube and vascular development in mouse embryos lacking fibronectin.  
699 *Development* **119**:1079–91.
- 700 Georges-Labouesse EN, George EL, Rayburn H, Hynes RO. 1996. Mesodermal development in  
701 mouse embryos mutant for fibronectin. *Dev Dyn* **207**:145–56. doi:10.1002/(SICI)1097-  
702 0177(199610)207:2<145::AID-AJA3>3.0.CO;2-H
- 703 Girós A, Grgur K, Gossler A, Costell M. 2011.  $\alpha 5 \beta 1$  integrin-mediated adhesion to fibronectin is  
704 required for axis elongation and somitogenesis in mice. *PLoS One* **6**:e22002.  
705 doi:10.1371/journal.pone.0022002
- 706 Goh KL, Yang JT, Hynes RO. 1997. Mesodermal defects and cranial neural crest apoptosis in  
707 alpha5 integrin-null embryos. *Development* **124**:4309–19.
- 708 Gomes de Almeida P, Pinheiro GG, Nunes AM, Gonçalves AB, Thorsteinsdóttir S. 2016.  
709 Fibronectin assembly during early embryo development: A versatile communication system  
710 between cells and tissues. *Dev Dyn* **245**:520–35. doi:10.1002/dvdy.24391
- 711 Gordon WR, Zimmerman B, He L, Miles LJ, Huang J, Tiyanont K, McArthur DG, Aster JC, Perrimon  
712 N, Loparo JJ, Blacklow SC. 2015. Mechanical Allostery: Evidence for a Force Requirement in  
713 the Proteolytic Activation of Notch. *Dev Cell* **33**:729–36. doi:10.1016/j.devcel.2015.05.004
- 714 Hamburger V, Hamilton HL. 1992. A series of normal stages in the development of the chick  
715 embryo. *Dev Dyn* **195**:231–272. doi:10.1002/aja.1001950404
- 716 Henrique D, Adam J, Myat A, Chitnis A, Lewis J, Ish-Horowicz D. 1995. Expression of a Delta  
717 homologue in prospective neurons in the chick. *Nature* **375**:787–790.  
718 doi:10.1038/375787a0
- 719 Hiramatsu R, Matsuoka T, Kimura-Yoshida C, Han S-W, Mochida K, Adachi T, Takayama S, Matsuo  
720 I. 2013. External Mechanical Cues Trigger the Establishment of the Anterior-Posterior Axis  
721 in Early Mouse Embryos. *Dev Cell* **27**:131–144. doi:10.1016/j.devcel.2013.09.026
- 722 Horton ER, Humphries JD, James J, Jones MC, Askari JA, Humphries MJ. 2016. The integrin

- 723           adhesome network at a glance. *J Cell Sci* **129**:4159–4163. doi:10.1242/jcs.192054
- 724   Hubaud A, Pourquié O. 2014. Signalling dynamics in vertebrate segmentation. *Nat Rev Mol Cell*  
725           *Biol* **15**:709–721. doi:10.1038/nrm3891
- 726   Hubaud A, Regev I, Mahadevan L, Pourquié O. 2017. Excitable dynamics and Yap-dependent  
727           mechanical cues drive the segmentation clock. *Cell* **171**:668–682.e11.  
728           doi:10.1016/j.cell.2017.08.043
- 729   Hunter GL, He L, Perrimon N, Charras G, Giniger E, Baum B. 2019. A role for actomyosin  
730           contractility in Notch signaling. *BMC Biol* **17**:12. doi:10.1186/s12915-019-0625-9
- 731   Huveneers S, Truong H, Fässler R, Sonnenberg A, Danen EHJ. 2008. Binding of soluble fibronectin  
732           to integrin alpha5 beta1 - link to focal adhesion redistribution and contractile shape. *J Cell*  
733           *Sci* **121**:2452–62. doi:10.1242/jcs.033001
- 734   Jouve C, Palmeirim I, Henrique D, Beckers J, Gossler A, Ish-Horowicz D, Pourquié O. 2000. Notch  
735           signalling is required for cyclic expression of the hairy-like gene HES1 in the presomitic  
736           mesoderm. *Development* **127**:1421–1429. doi:10.1016/S0092-8674(00)80451-1
- 737   Jülich D, Cobb G, Melo AM, McMillen P, Lawton AK, Mochrie SGJ, Rhoades E, Holley SA. 2015.  
738           Cross-scale integrin regulation organizes ECM and tissue topology. *Dev Cell* **34**:33–44.  
739           doi:10.1016/j.devcel.2015.05.005
- 740   Jülich D, Geisler R, Holley SA, Tübingen 2000 Screen Consortium. 2005. Integrin alpha5 and  
741           delta/notch signaling have complementary spatiotemporal requirements during zebrafish  
742           somitogenesis. *Dev Cell* **8**:575–86. doi:10.1016/j.devcel.2005.01.016
- 743   Kocsis E, Trus BL, Steer CJ, Bisher ME, Steven AC. 1991. Image averaging of flexible fibrous  
744           macromolecules: the clathrin triskelion has an elastic proximal segment. *J Struct Biol* **107**:6–  
745           14. doi:10.1093/bioinformatics/btp184
- 746   Koshida S, Kishimoto Y, Ustumi H, Shimizu T, Furutani-Seiki M, Kondoh H, Takada S. 2005.  
747           Integrin alpha5-dependent fibronectin accumulation for maintenance of somite boundaries  
748           in zebrafish embryos. *Dev Cell* **8**:587–98. doi:10.1016/j.devcel.2005.03.006

- 749 Kragtorp KA, Miller JR. 2007. Integrin alpha5 is required for somite rotation and boundary  
750 formation in *Xenopus*. *Dev Dyn* **236**:2713–20. doi:10.1002/dvdy.21280
- 751 Lauschke VM, Tsiairis CD, François P, Aulehla A. 2013. Scaling of embryonic patterning based on  
752 phase-gradient encoding. *Nature* **493**:101–105. doi:10.1038/nature11804
- 753 Lawton AK, Nandi A, Stulberg MJ, Dray N, Sneddon MW, Pontius W, Emonet T, Holley SA. 2013.  
754 Regulated tissue fluidity steers zebrafish body elongation. *Development* **140**:573–582.  
755 doi:10.1242/dev.090381
- 756 Luca VC, Kim BC, Ge C, Kakuda S, Wu D, Roein-Peikar M, Haltiwanger RS, Zhu C, Ha T, Garcia KC.  
757 2017. Notch-Jagged complex structure implicates a catch bond in tuning ligand sensitivity.  
758 *Science (80- )* **355**:1320–1324. doi:10.1126/science.aaf9739
- 759 Mao Y, Schwarzbauer JE. 2005. Fibronectin fibrillogenesis, a cell-mediated matrix assembly  
760 process. *Matrix Biol* **24**:389–399. doi:10.1016/j.matbio.2005.06.008
- 761 Marek M, Kubíček M. 1981. Morphogen pattern formation and development in growth. *Bull*  
762 *Math Biol* **43**:259–70.
- 763 Marrese M, Antonovaite N, Nelemans BKA, Smit TH, Iannuzzi D. 2019. Micro-indentation and  
764 optical coherence tomography for the mechanical characterization of embryos:  
765 Experimental setup and measurements on chicken embryos. *Acta Biomater*.  
766 doi:10.1016/j.actbio.2019.07.056
- 767 Martins GG, Rifes P, Amândio R, Rodrigues G, Palmeirim I, Thorsteinsdóttir S. 2009. Dynamic 3D  
768 cell rearrangements guided by a fibronectin matrix underlie somitogenesis. *PLoS One*  
769 **4**:e7429. doi:10.1371/journal.pone.0007429
- 770 Masamizu Y, Ohtsuka T, Takashima Y, Nagahara H, Takenaka Y, Yoshikawa K, Okamura H,  
771 Kageyama R. 2006. Real-time imaging of the somite segmentation clock: Revelation of  
772 unstable oscillators in the individual presomitic mesoderm cells. *Proc Natl Acad Sci*  
773 **103**:1313–1318. doi:10.1073/pnas.0508658103
- 774 McKeown-Longo PJ, Mosher DF. 1985. Interaction of the 70,000-mol-wt amino-terminal

- 775 fragment of fibronectin with the matrix-assembly receptor of fibroblasts. *J Cell Biol*
- 776 **100**:364–74. doi:10.1083/jcb.100.2.364
- 777 Meloty-Kapella L, Shergill B, Kuon J, Botvinick E, Weinmaster G. 2012. Notch Ligand Endocytosis
- 778 Generates Mechanical Pulling Force Dependent on Dynamin, Epsins, and Actin. *Dev Cell*
- 779 **22**:1299–1312. doi:10.1016/j.devcel.2012.04.005
- 780 Merle T, Farge E. 2018. Trans-scale mechanotransductive cascade of biochemical and
- 781 biomechanical patterning in embryonic development: the light side of the force. *Curr Opin*
- 782 *Cell Biol* **55**:111–118. doi:10.1016/j.cecb.2018.07.003
- 783 Mongera A, Rowghanian P, Gustafson HJ, Shelton E, Kealhofer DA, Carn EK, Serwane F, Lucio AA,
- 784 Giammona J, Campàs O. 2018. A fluid-to-solid jamming transition underlies vertebrate body
- 785 axis elongation. *Nature* **561**:401–405. doi:10.1038/s41586-018-0479-2
- 786 Morimoto M, Takahashi Y, Endo M, Saga Y. 2005. The Mesp2 transcription factor establishes
- 787 segmental borders by suppressing Notch activity. *Nature* **435**:354–359.
- 788 doi:10.1038/nature03591
- 789 Morin-Kensicki EM, Boone BN, Howell M, Stonebraker JR, Teed J, Alb JG, Magnuson TR, O’Neal
- 790 W, Milgram SL. 2006. Defects in Yolk Sac Vasculogenesis, Chorioallantoic Fusion, and
- 791 Embryonic Axis Elongation in Mice with Targeted Disruption of Yap65. *Mol Cell Biol* **26**:77–
- 792 87. doi:10.1128/MCB.26.1.77-87.2006
- 793 Mui KL, Chen CS, Assoian RK. 2016. The mechanical regulation of integrin–cadherin crosstalk
- 794 organizes cells, signaling and forces. *J Cell Sci* **129**:1093–1100. doi:10.1242/jcs.183699
- 795 Nakajima Y, Morimoto M, Takahashi Y, Koseki H, Saga Y. 2006. Identification of Epha4 enhancer
- 796 required for segmental expression and the regulation by Mesp2. *Development* **133**:2517–
- 797 25. doi:10.1242/dev.02422
- 798 Newell-Litwa KA, Horwitz R, Lamers ML. 2015. Non-muscle myosin II in disease: mechanisms and
- 799 therapeutic opportunities. *Dis Model Mech* **8**:1495–515. doi:10.1242/dmm.022103
- 800 Niwa Y, Shimojo H, Isomura A, Gonzalez A, Miyachi H, Kageyama R. 2011. Different types of

- 801 oscillations in Notch and Fgf signaling regulate the spatiotemporal periodicity of  
802 somitogenesis. *Genes Dev* **25**:1115–1120. doi:10.1101/gad.2035311
- 803 Palmeirim I, Dubrulle J, Henrique D, Ish-Horowicz D, Pourquié O. 1998. Uncoupling segmentation  
804 and somitogenesis in the chick presomitic mesoderm. *Dev Genet* **23**:77–85.  
805 doi:10.1002/(SICI)1520-6408(1998)23:1<77::AID-DVG8>3.0.CO;2-3
- 806 Palmeirim I, Henrique D, Ish-Horowicz D, Pourquié O. 1997. Avian hairy gene expression  
807 identifies a molecular clock linked to vertebrate segmentation and somitogenesis. *Cell*  
808 **91**:639–648. doi:10.1016/S0092-8674(00)80451-1
- 809 Piccolo S, Dupont S, Cordenonsi M. 2014. The Biology of YAP/TAZ: Hippo Signaling and Beyond.  
810 *Physiol Rev* **94**:1287–1312. doi:10.1152/physrev.00005.2014
- 811 Pierschbacher MD, Ruoslahti E. 1984. Cell attachment activity of fibronectin can be duplicated by  
812 small synthetic fragments of the molecule. *Nature* **309**:30–3.
- 813 Pourquié O, Tam PPL. 2001. A nomenclature for prospective somites and phases of cyclic gene  
814 expression in the presomitic mesoderm. *Dev Cell* **1**:619–20. doi:10.1016/S1534-  
815 5807(01)00082-X
- 816 Preibisch S, Saalfeld S, Tomancak P. 2009. Globally optimal stitching of tiled 3D microscopic  
817 image acquisitions. *Bioinformatics* **25**:1463–1465. doi:10.1093/bioinformatics/btp184
- 818 Prieto D, Aparicio G, Machado M, Zolessi FR. 2015. Application of the DNA-specific stain methyl  
819 green in the fluorescent labeling of embryos. *J Vis Exp* e52769. doi:10.3791/52769
- 820 Rallis C, Pinchin SM, Ish-Horowicz D. 2010. Cell-autonomous integrin control of Wnt and Notch  
821 signalling during somitogenesis. *Development* **137**:3591–3601. doi:10.1242/dev.050070
- 822 Rifes P, Carvalho L, Lopes C, Andrade RP, Rodrigues G, Palmeirim I, Thorsteinsdóttir S. 2007.  
823 Redefining the role of ectoderm in somitogenesis: a player in the formation of the  
824 fibronectin matrix of presomitic mesoderm. *Development* **134**:3155–3165.  
825 doi:10.1242/dev.003665
- 826 Rifes P, Thorsteinsdóttir S. 2012. Extracellular matrix assembly and 3D organization during

- 827 paraxial mesoderm development in the chick embryo. *Dev Biol* **368**:370–381.
- 828 doi:10.1016/j.ydbio.2012.06.003
- 829 Ringer P, Colo G, Fässler R, Grashoff C. 2017. Sensing the mechano-chemical properties of the
- 830 extracellular matrix. *Matrix Biol* **64**:6–16. doi:10.1016/j.matbio.2017.03.004
- 831 Saga Y. 2012. The mechanism of somite formation in mice. *Curr Opin Genet Dev* **22**:331–338.
- 832 doi:10.1016/j.gde.2012.05.004
- 833 Saga Y, Takeda H. 2001. The making of the somite: molecular events in vertebrate segmentation.
- 834 *Nat Rev Genet* **2**:835–845. doi:10.1038/35098552
- 835 Sato Y, Nagatoshi K, Hamano A, Imamura Y, Huss D, Uchida S, Lansford R. 2017. Basal filopodia
- 836 and vascular mechanical stress organize fibronectin into pillars bridging the mesoderm-
- 837 endoderm gap. *Development* **144**:281–291. doi:10.1242/dev.141259
- 838 Sato Y, Sato Y, Kasai T, Kasai T, Nakagawa S, Nakagawa S, Tanabe K, Tanabe K, Watanabe T,
- 839 Watanabe T, Kawakami K, Kawakami K, Takahashi Y, Takahashi Y. 2007. Stable integration
- 840 and conditional expression of electroporated transgenes in chicken embryos. *Dev Biol*
- 841 **305**:616–24. doi:10.1016/j.ydbio.2007.01.043
- 842 Sato Y, Yasuda K, Takahashi Y. 2002. Morphological boundary forms by a novel inductive event
- 843 mediated by Lunatic fringe and Notch during somitic segmentation. *Development*
- 844 **129**:3633–44.
- 845 Schiller HB, Hermann M-R, Polleux J, Vignaud T, Zanivan S, Friedel CC, Sun Z, Raducanu A,
- 846 Gottschalk K-E, Théry M, Mann M, Fässler R. 2013.  $\beta$ 1- and  $\alpha$ v-class integrins cooperate to
- 847 regulate myosin II during rigidity sensing of fibronectin-based microenvironments. *Nat Cell*
- 848 *Biol* **15**:625–636. doi:10.1038/ncb2747
- 849 Schwartz MA, DeSimone DW. 2008. Cell adhesion receptors in mechanotransduction. *Curr Opin*
- 850 *Cell Biol* **20**:551–556. doi:10.1016/j.ceb.2008.05.005
- 851 Shih NP, Francois P, Delaune EA, Amacher SL. 2015. Dynamics of the slowing segmentation clock
- 852 reveal alternating two-segment periodicity. *Development* **142**:1785–1793.

- 853           doi:10.1242/dev.119057
- 854   Singh P, Carraher C, Schwarzbauer JE. 2010. Assembly of Fibronectin Extracellular Matrix. *Annu*  
855           *Rev Cell Dev Biol* **26**:397–419. doi:10.1146/annurev-cellbio-100109-104020
- 856   Slack JMW. 1987. We have a morphogen! *Nature* **327**:553–554. doi:10.1038/327553a0
- 857   Smutny M, Ákos Z, Grigolon S, Shamipour S, Ruprecht V, Čapek D, Behrndt M, Papusheva E, Tada  
858           M, Hof B, Vicsek T, Salbreux G, Heisenberg CP. 2017. Friction forces position the neural  
859           anlage. *Nat Cell Biol* **19**:306–317. doi:10.1038/ncb3492
- 860   Straight AF, Cheung A, Limouze J, Chen I, Westwood NJ, Sellers JR, Mitchison TJ. 2003. Dissecting  
861           temporal and spatial control of cytokinesis with a myosin II Inhibitor. *Science* **299**:1743–7.  
862           doi:10.1126/science.1081412
- 863   Takahashi Y, Inoue T, Gossler A, Saga Y. 2003. Feedback loops comprising Dll1, Dll3 and Mesp2,  
864           and differential involvement of Psen1 are essential for rostrocaudal patterning of somites.  
865           *Development* **130**:4259–68. doi:10.1242/dev.00629
- 866   Takahashi Y, Koizumi K, Takagi A, Kitajima S, Inoue T, Koseki H, Saga Y. 2000. Mesp2 initiates  
867           somite segmentation through the Notch signalling pathway. *Nat Genet* **25**:390–6.  
868           doi:10.1038/78062
- 869   Takeichi M. 2014. Dynamic contacts: rearranging adherens junctions to drive epithelial  
870           remodelling. *Nat Rev Mol Cell Biol* **15**:397–410. doi:10.1038/nrm3802
- 871   Tiedemann H. 1976. Pattern formation in early developmental stages of amphibian embryos. *J*  
872           *Embryol Exp Morphol* **35**:437–44.
- 873   Watanabe T, Sato Y, Saito D, Tadokoro R, Takahashi Y. 2009. EphrinB2 coordinates the formation  
874           of a morphological boundary and cell epithelialization during somite segmentation. *Proc*  
875           *Natl Acad Sci* **106**:7467–7472. doi:10.1073/pnas.0902859106
- 876   Wolfenson H, Lavelin I, Geiger B. 2013. Dynamic regulation of the structure and functions of  
877           integrin adhesions. *Dev Cell* **24**:447–58. doi:10.1016/j.devcel.2013.02.012
- 878   Wolfenson H, Yang B, Sheetz MP. 2019. Steps in Mechanotransduction Pathways that Control

- 879 Cell Morphology. *Annu Rev Physiol* **81**:585–605. doi:10.1146/annurev-physiol-021317-  
880 121245
- 881 Yang JT, Bader BL, Kreidberg J a, Ullman-Culleré M, Trevithick JE, Hynes RO. 1999. Overlapping  
882 and independent functions of fibronectin receptor integrins in early mesodermal  
883 development. *Dev Biol* **215**:264–277. doi:10.1006/dbio.1999.9451
- 884 Yang JT, Rayburn H, Hynes RO. 1993. Embryonic mesodermal defects in alpha 5 integrin-deficient  
885 mice. *Development* **119**:1093–105.
- 886 Yarrow JC, Totsukawa G, Charras GT, Mitchison TJ. 2005. Screening for cell migration inhibitors  
887 via automated microscopy reveals a Rho-kinase inhibitor. *Chem Biol* **12**:385–95.  
888 doi:10.1016/j.chembiol.2005.01.015
- 889 Zaidel-Bar R. 2013. Cadherin adhesome at a glance. *J Cell Sci* **126**:373–378.  
890 doi:10.1242/jcs.111559
- 891 Zaidel-Bar R, Zhenhuan G, Luxenburg C. 2015. The contractome - a systems view of actomyosin  
892 contractility in non-muscle cells. *J Cell Sci* **128**:2209–2217. doi:10.1242/jcs.170068



893 **Supplementary Figures**

894

895

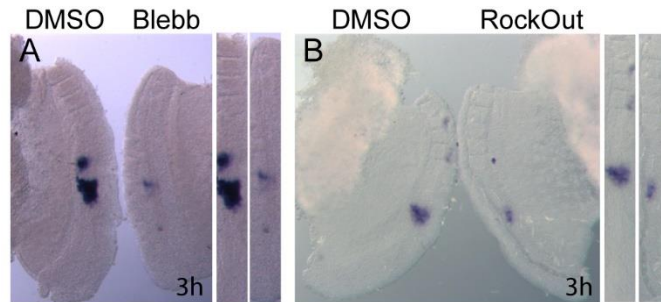

896

897

898 **Supplementary Figure 1. Blocking NM II or ROCK I/II activity for 3 hours leads to altered *meso1* expression.**

899 **(A, B)** *meso1* expression evaluated by *in situ* hybridization in explants treated for 3 hours with Blebbistatin

900 **(A)** or RockOut **(B)** and in the respective contralateral controls, shows that *meso1* expression is already

901 altered two clock cycles after adding the drugs. Straightened images of the respective explant pairs (right)

902 were aligned by SIV. Rostral is on top.

903

904

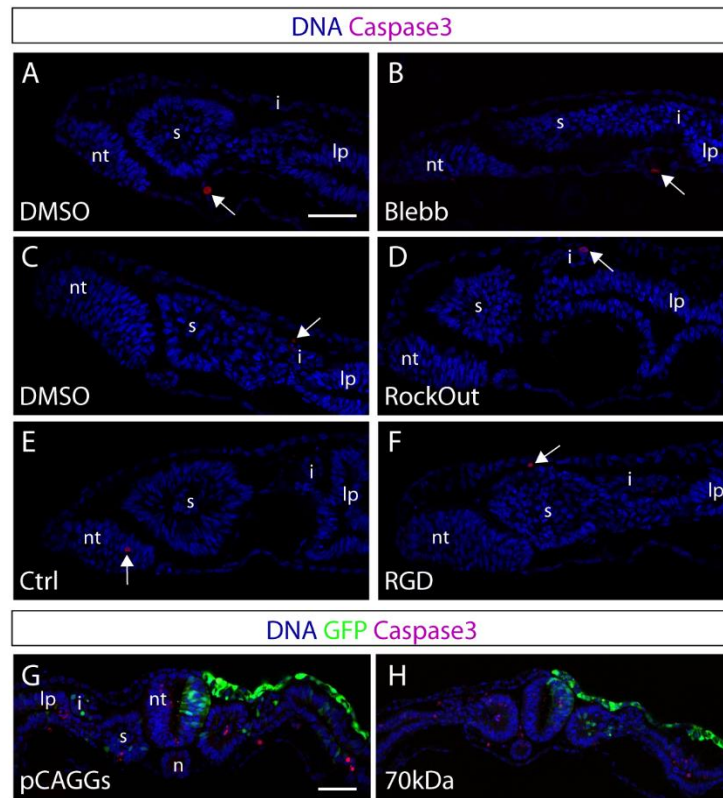

905

906 **Supplementary Figure 2. Apoptosis is not enhanced in the experimental culture conditions used.**

907 (A, H) Immunostaining for activated Caspase3 in transverse sections of control and contralateral explants  
908 treated with either Blebbistatin (A, B), RockOut (C, D), or RGD (E, F) for 6 hours, and in pCAGGs- and 70kDa-  
909 electroporated embryos (G, H). DNA (blue), activated Caspase3 (magenta) and GFP (green). Arrows indicate  
910 Caspase3-positive cells. Apoptosis levels are not increased by any of the treatments. Blebb – Blebbistatin;  
911 nt – neural tube; s – somite; i – intermediate mesoderm; lp – lateral plate mesoderm. Dorsal is on top. Scale  
912 bars: 50  $\mu$ m.

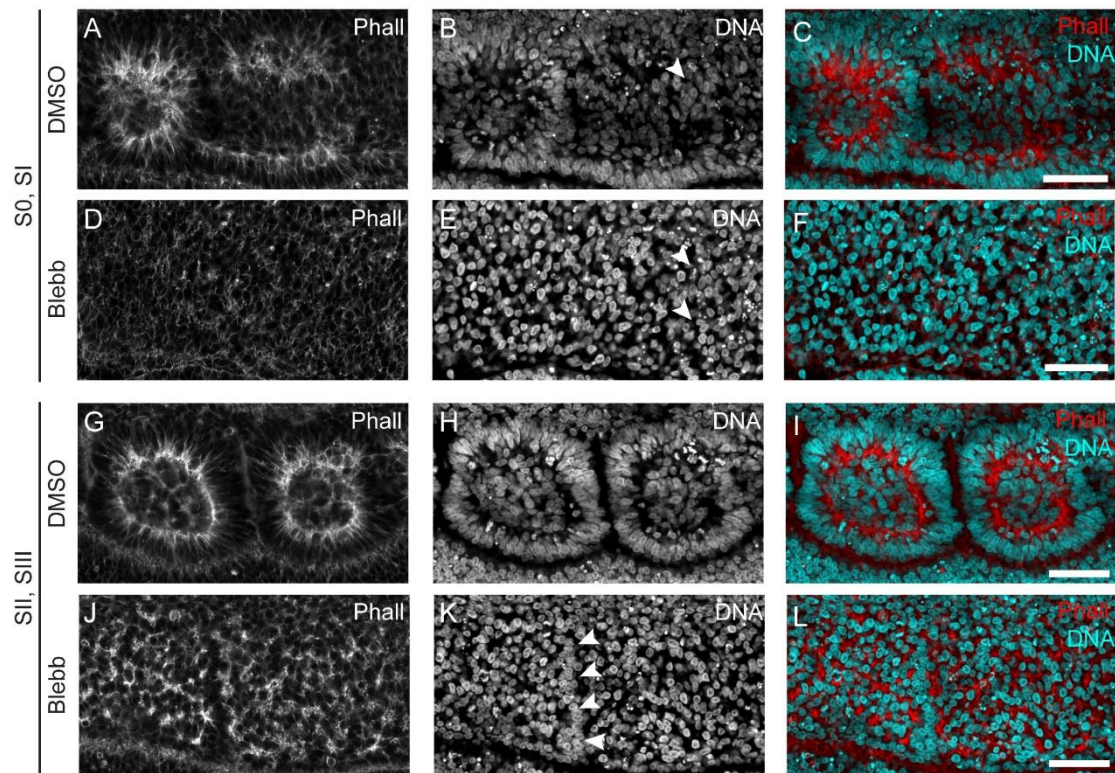

913

914

**Supplementary Figure 3. NM II inhibition impairs F-actin apical enrichment and nuclear alignment in somites formed during culture.**

915

916

**(A, L)** Sagittal optical sections of DMSO-treated explants (A-C, G-I) and contralateral Blebbistatin-treated explants (D-F, J-L) stained for F-actin and DNA. Rostral PSM epithelialization of DMSO-treated explants

917

occurs normally, with F-actin apical enrichment (A) and nuclear alignment (B) in SO and SI. At the same axial level in the contralateral Blebbistatin-treated explant (D-F), F-actin staining is dispersed (D) and nuclei do

918

not align (E). SII and SIII of DMSO-treated explants are epithelial (G-I), composed of an outer cell layer with aligned nuclei (H) and elongated cells with apically enriched F-actin (G).

919

At the equivalent axial level in the Blebbistatin-treated explant (J-L), the somitic segments were severely affected. There is only a slight nuclear alignment at the prospective inter-somitic border (K, arrowheads) and F-actin aggregates into dispersed and

920

separate foci (J, L). Rostral to the left and dorsal on top. Blebb – Blebbistatin; Phall – phalloidin F-actin staining. Scale bars: 50 μm.

921

922

923

924

925

### Neural Tube

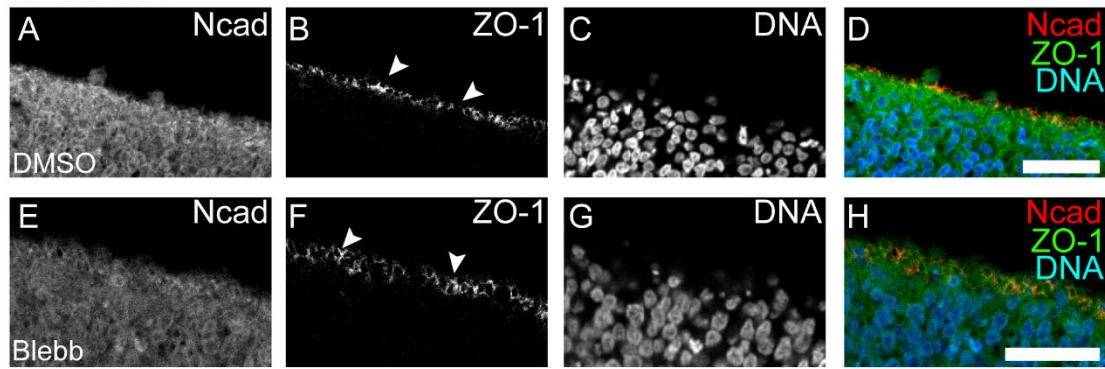

### Ectoderm

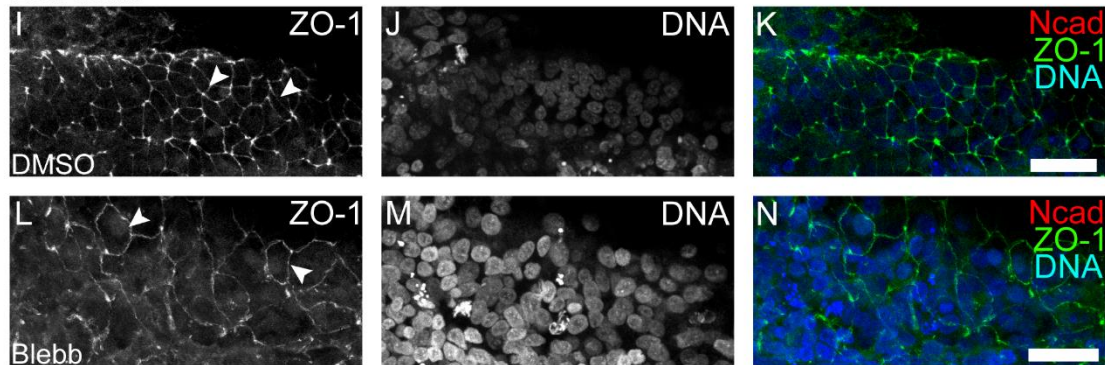

926

927

928

929

930

931

932

933

934

**Supplementary Figure 4. Epithelial structure of the neural tube and ectoderm are unaffected by NM II inhibition.**

(A, N) Control explants (A-D and I-K) showed strong apically located ZO-1 labeling (B, I, arrowheads) both in the neural tube (A-D; transverse optical section, medial on top) and in the overlying surface ectoderm (I-K; dorsal view of ectoderm). In the presence of Blebbistatin (E-H, L-N), ZO-1 labeling remained restricted to the apical end of neural tube cells (F, arrowheads) and of surface ectoderm cells (L, arrowheads). Blebb – Blebbistatin; Ncad – N-cadherin. ZO-1 – *Zonula occludens* protein 1. Arrowheads point to ZO-1 labeling. Scale bars: 20  $\mu$ m.



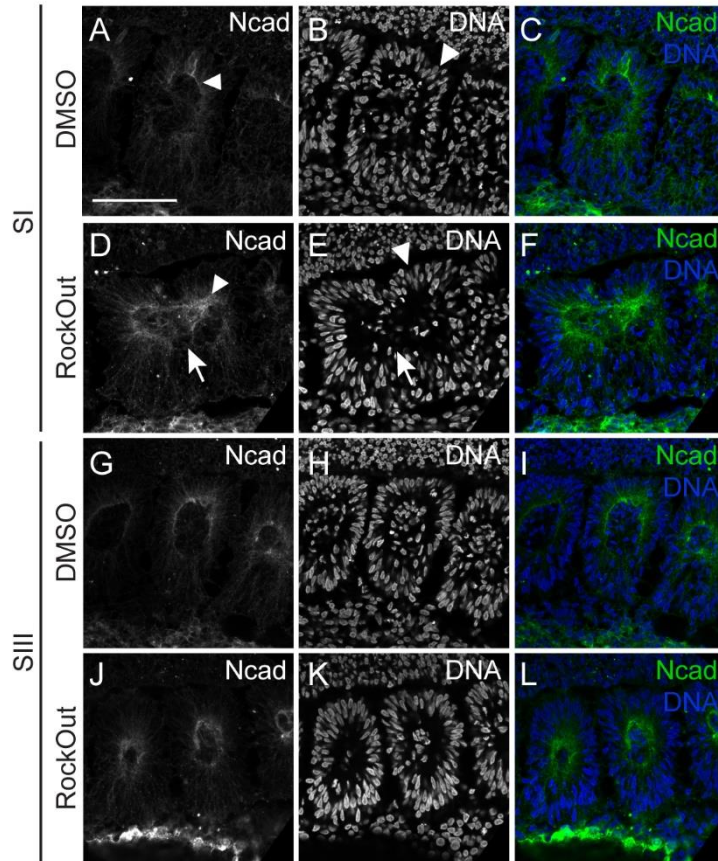

935

936

**Supplementary Figure 5. ROCK I/II inhibition impairs apical polarization of N-cadherin in nascent somites.**

937

**(A, L)** Longitudinal sections of explants cultured for 6 hours in control (DMSO) medium (A-C, G-I) and their

938

contralateral RockOut-treated halves (D-F, J-L) at SI (A-F) and SIII (G-L) levels, immunostained for N-cadherin

939

(first column) and stained for DNA (second column). Third column shows the respective merge of all

940

stainings. SI in control explants shows normal accumulation of N-cadherin (A, arrowhead) and nuclear

941

alignment (B, arrowhead). In contrast, SI in contralateral RockOut-treated explants fail to form a clear cleft

942

(D-F, arrows) leading to partially fused somites. N-cadherin is, however, partially polarized (D, arrowhead)

943

and nuclei are aligned (E, arrowhead). At SIII level, both explants show normal N-cadherin polarization (G, J)

944

and nuclear alignment (H, L). Rostral on the left and midline on top. Ncad - N-cadherin. Scale bars: 50  $\mu$ m.

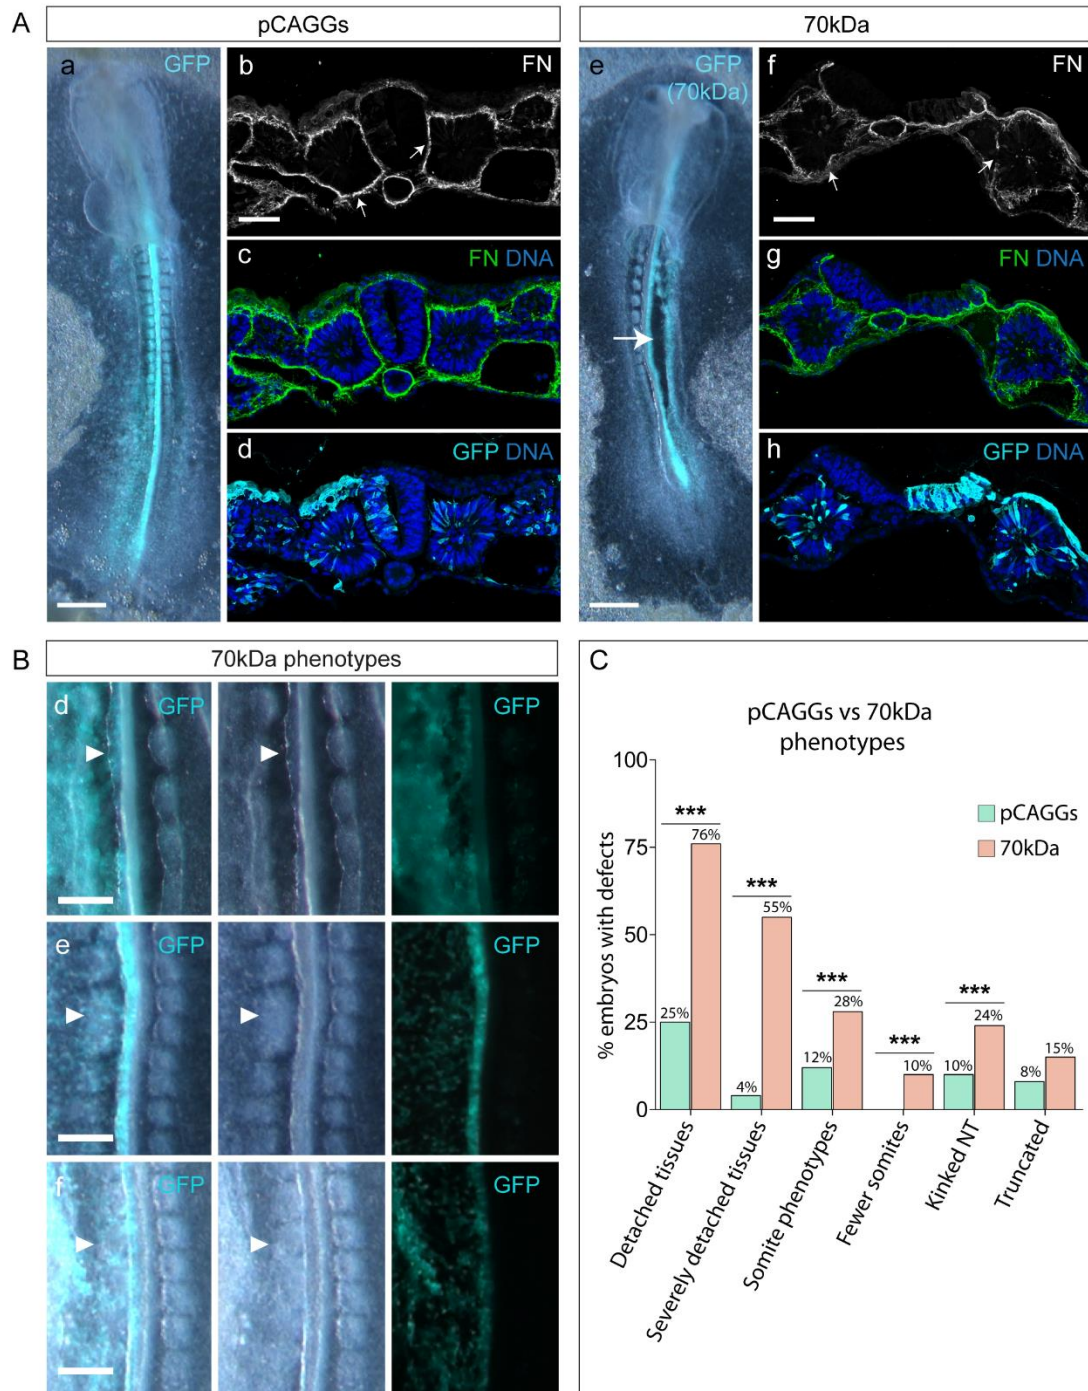

945

946 **Supplementary Figure 6. Embryos electroporated with the 70kDa construct exhibit numerous**  
 947 **morphological defects.**

948 **(A)** Representative images of the morphology of embryos electroporated with either pCAGGs only (a) or  
 949 70kDa, the latter being a severe phenotype (e). Severe phenotypes included severely detached tissues (e,  
 950 arrow) and a truncated A-P axis. Transverse sections of pCAGGs- (b-d) and 70kDa-electroporated embryos  
 951 (f-h) immunostained for fibronectin (b-c, f-g), GFP (d, h) and stained for DNA (c-d, g-h). Electroporated side  
 952 is on left (a-d) or right (e-h). Detachment of tissues is clearly visible in 70kDa-electroporated embryos (e),  
 953 which is accompanied by a severe disruption in the fibronectin matrix (compare b-c with f-g, arrows). **(B)**  
 954 Close up of embryos electroporated with 70kDa showing kinked neural tube (d, arrowheads), fused somites  
 955 (e, arrowheads) and fewer somites on the electroporated side (f, arrowheads). Electroporated sides are on  
 956 left. Ventral view and rostral on top. **(C)** Percentage of pCAGGS- (green bars) and 70kDa-electroporated (pink



957 bars) embryos with morphological defects, including detached (pCAGGs: 39/154, 70kDa: 97/144) and  
958 severely detached tissues (pCAGGs: 6/154, 70kDa: 79/144), kinked neural tube (pCAGGs: 15/154, 70kDa:  
959 34/144), truncated A-P axis (pCAGGs: 13/154, 70kDa: 21/144), abnormal somite morphology (pCAGGs:  
960 18/154, 70kDa: 41/144), and fewer somites on the electroporated side compared to the control non-  
961 electroporated side (pCAGGs: 0/154, 70kDa: 15/144). p values were calculated using a Chi-square test.  
962 \*\*\*p<0.001. FN – fibronectin. Scale bars: (A, a, e; C, a-c) 500  $\mu$ m, (C, d-f) 200  $\mu$ m, (A, b-d, f-h) 50  $\mu$ m.

963

Length and width of SI and SV of non-electroporated side vs of pCAGGs/70kDa side

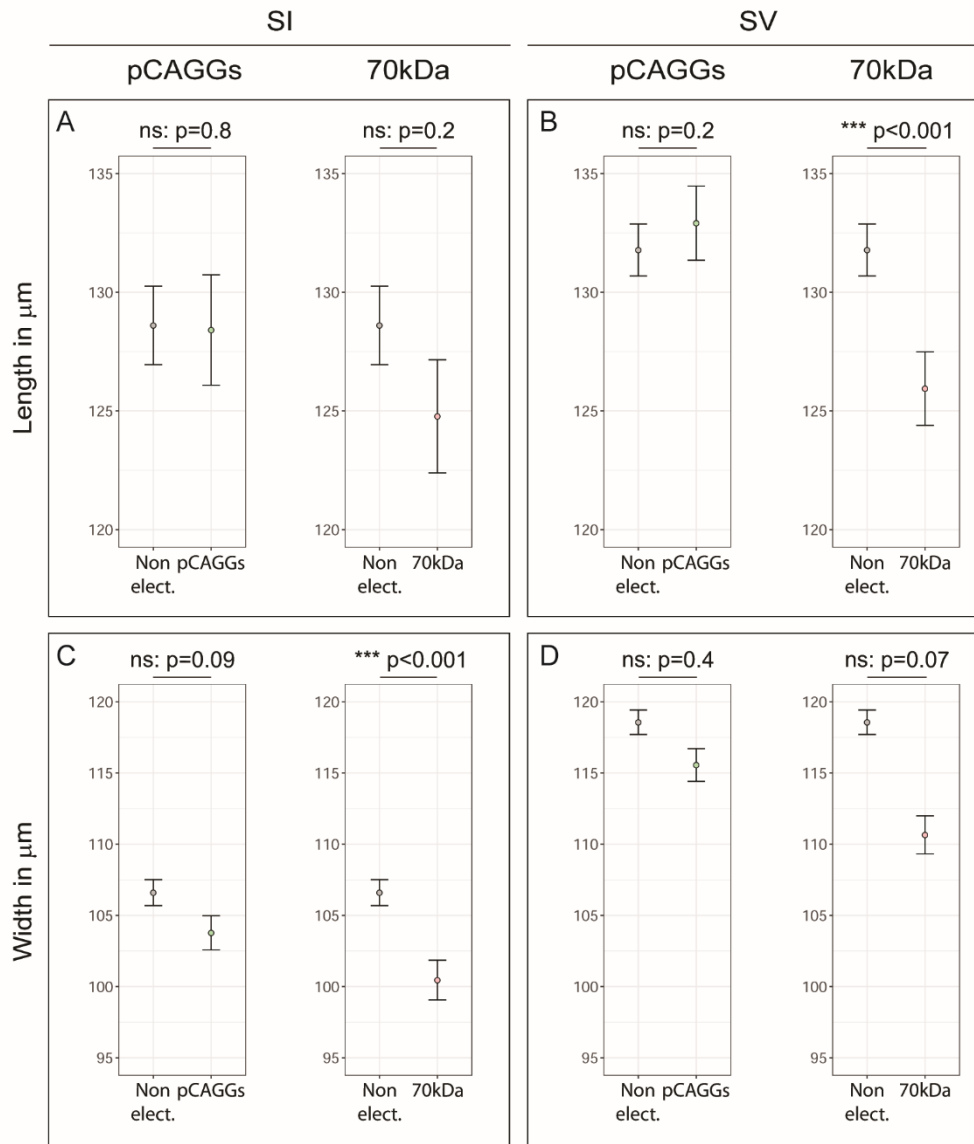

964

965 **Supplementary Figure 7. Quantification of somite length and width in pCAGGs- and 70kDa-electroporated**  
966 **embryos.**

967 **(A-D)** Length of SI (A) and SV (B) and width of SI (C) and SV (D) from pCAGGS- and 70kDa-electroporated  
968 embryos compared to the control non-electroporated side. The measurements were made on images from  
969 whole mount embryos. Somites from pCAGGs-electroporated embryos did not show a significant difference  
970 in either length or width between electroporated vs non-electroporated sides (n=151), but the width of SI  
971 and length of SV of the electroporated side of 70kDa-treated embryos were significantly smaller than that  
972 of the contralateral non-electroporated control side (n=143). Bars represent the standard error of the mean.  
973 p values were calculated using a nested ANOVA. ns – not significant; \*\*\* p<0.001.
